# Supplementary material for: Treatment persistence and exacerbations in patients with asthma initiating treatment with inhaled corticosteroids and beta-adrenergic agonists: retrospective cohort study
Source: PubMed Central journal article supplement — BMJ Open. 2022 Apr 19;12(4):e053964. doi: 10.1136/bmjopen-2021-053964 (PMC9021812; doi:10.1136/bmjopen-2021-053964), 2022-04-19
Supplement: bmjopen-2021-053964.draft_revisions.pdf [file bmjopen-2021-053964.draft_revisions.pdf]

# BMJ Open

BMJ Open is committed to open peer review. As part of this commitment we make the peer review history of every article we publish publicly available.

When an article is published we post the peer reviewers' comments and the authors' responses online. We also post the versions of the paper that were used during peer review. These are the versions that the peer review comments apply to.

The versions of the paper that follow are the versions that were submitted during the peer review process. They are not the versions of record or the final published versions. They should not be cited or distributed as the published version of this manuscript.

BMJ Open is an open access journal and the full, final, typeset and author-corrected version of record of the manuscript is available on our site with no access controls, subscription charges or pay-per-view fees (<http://bmjopen.bmj.com>).

If you have any questions on BMJ Open's open peer review process please email [info.bmjopen@bmj.com](mailto:info.bmjopen@bmj.com)

# BMJ Open

## Treatment persistence and exacerbations in asthmatic patients initiating treatment with inhaled corticosteroids and beta-adrenergic agonists (ICS/LABA): real-life study.

|                               |                                                                                                                                                                                                                                                                                                                                                                                                                        |
|-------------------------------|------------------------------------------------------------------------------------------------------------------------------------------------------------------------------------------------------------------------------------------------------------------------------------------------------------------------------------------------------------------------------------------------------------------------|
| Journal:                      | <i>BMJ Open</i>                                                                                                                                                                                                                                                                                                                                                                                                        |
| Manuscript ID                 | bmjopen-2021-053964                                                                                                                                                                                                                                                                                                                                                                                                    |
| Article Type:                 | Original research                                                                                                                                                                                                                                                                                                                                                                                                      |
| Date Submitted by the Author: | 29-May-2021                                                                                                                                                                                                                                                                                                                                                                                                            |
| Complete List of Authors:     | Sicras-Mainar, Antoni; Atrys Health SA, HEOR<br>Gómez Rodríguez, Belén; University Hospital Virgen de la Victoria, Pulmonology Service<br>Traseira-Lugilde, Susana; Mundipharma Pharmaceuticals SL, Medical Department<br>Fernández-Sánchez, Toni; Mundipharma Pharmaceuticals SL, Medical Department<br>Velasco Garrido, José Luis; University Hospital Virgen de la Victoria, Virgen de la Victoria Hospital Complex |
| Keywords:                     | Asthma < THORACIC MEDICINE, RESPIRATORY MEDICINE (see Thoracic Medicine), THERAPEUTICS                                                                                                                                                                                                                                                                                                                                 |
|                               |                                                                                                                                                                                                                                                                                                                                                                                                                        |

SCHOLARONE™  
Manuscripts

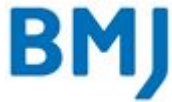

I, the Submitting Author has the right to grant and does grant on behalf of all authors of the Work (as defined in the below author licence), an exclusive licence and/or a non-exclusive licence for contributions from authors who are: i) UK Crown employees; ii) where BMJ has agreed a CC-BY licence shall apply, and/or iii) in accordance with the terms applicable for US Federal Government officers or employees acting as part of their official duties; on a worldwide, perpetual, irrevocable, royalty-free basis to BMJ Publishing Group Ltd ("BMJ") its licensees and where the relevant Journal is co-owned by BMJ to the co-owners of the Journal, to publish the Work in this journal and any other BMJ products and to exploit all rights, as set out in our [licence](#).

The Submitting Author accepts and understands that any supply made under these terms is made by BMJ to the Submitting Author unless you are acting as an employee on behalf of your employer or a postgraduate student of an affiliated institution which is paying any applicable article publishing charge ("APC") for Open Access articles. Where the Submitting Author wishes to make the Work available on an Open Access basis (and intends to pay the relevant APC), the terms of reuse of such Open Access shall be governed by a Creative Commons licence – details of these licences and which [Creative Commons](#) licence will apply to this Work are set out in our licence referred to above.

Other than as permitted in any relevant BMJ Author's Self Archiving Policies, I confirm this Work has not been accepted for publication elsewhere, is not being considered for publication elsewhere and does not duplicate material already published. I confirm all authors consent to publication of this Work and authorise the granting of this licence.

**Treatment persistence and exacerbations in asthmatic patients initiating treatment with inhaled corticosteroids and beta-adrenergic agonists (ICS/LABA): real-life study.**

Antoni Sicras-Mainar<sup>1</sup>  
 Belén Gómez Rodríguez<sup>2</sup>  
 Susana Traseira-Lugilde<sup>3</sup>  
 Toni Fernández-Sánchez<sup>3</sup>  
 José Luis Velasco Garrido<sup>2</sup>

[ansicras@atryshealth.com](mailto:ansicras@atryshealth.com)  
[belen.gomez.rodriguez.sspa@juntadeandalucia.es](mailto:belen.gomez.rodriguez.sspa@juntadeandalucia.es)  
[Susana.Traseira@mundipharma.es](mailto:Susana.Traseira@mundipharma.es)  
[Toni.Fernandez@mundipharma.es](mailto:Toni.Fernandez@mundipharma.es)  
[jvelascogarrido@hotmail.com](mailto:jvelascogarrido@hotmail.com)

- 1) Scientific Direction, Atrys Health, Barcelona. Spain.  
 2) Pulmonology Service. Virgen de la Victoria Hospital Complex, Malaga, Spain  
 3) Medical Department, Mundipharma Pharmaceuticals SL, Madrid, Spain

**CORRESPONDENCE:**

Antoni Sicras-Mainar  
 Atrys Health SA  
 C/Provença 392, bajos  
 08025 - Barcelona  
 T: +34 934 581 561, E-mail: [ansicras@atryshealth.com](mailto:ansicras@atryshealth.com)

**ABBREVIATIONS**

| Abbreviation     | Description                                           |
|------------------|-------------------------------------------------------|
| ATC              | Anatomical Therapeutic Chemical Classification System |
| BDP/FORM         | Beclomethasone/formoterol                             |
| BUD/FORM         | Budesonide/formoterol                                 |
| FEV <sub>1</sub> | Maximum expiratory volume in the first second         |
| FF/VI            | Fluticasone furoate/vilanterol                        |
| FP/FORM          | Fluticasone propionate/formoterol                     |
| FP/SAL           | Fluticasone propionate/salmeterol                     |
| ICS              | Inhaled corticosteroid                                |
| LABA             | Long-acting beta-2 agonist                            |
| LAMA             | Long-acting muscarinic antagonist                     |

## FUNDING

The study was sponsored by Mundipharma Pharmaceuticals.

## CONFLICT OF INTEREST

A. Sicras is an independent consultant funded by Mundipharma with respect to this manuscript. TF is an employee of Mundipharma. The other authors state they have no conflict of interest in relation to this study.

## AUTHOR CONTRIBUTIONS

A. Sicras and T. Fernández conceived and designed the manuscript; data collection and the statistical analysis were made by A. Sicras; and the interpretation of the data, writing, review and approval of the manuscript submitted, by all authors.

## ETHICS APPROVAL

His protocol was reviewed and approved at Foundation Redis (Ethical Research Committee; International University of Catalonia; code: ANT-PER-2017-01).

## DATA AVAILABILITY

The datasets generated during and/or analyzed during the current study are available from the corresponding author upon reasonable request.

## PATIENT CONSENT FOR PUBLICATION.

Not required.

## STRENGTHS AND LIMITATIONS OF THIS STUDY

- Reducing the risk of exacerbations is an important goal of asthma treatment. It is estimated that 36% of patients with asthma have exacerbations of varying intensity.
- Patients undergoing treatment with FP/FORM and FF/VI were associated with greater treatment adherence (persistence, MPR) and lower rates of exacerbations.
- This study has the limitations of retrospective observational studies.

## PATIENT AND PUBLIC INVOLVEMENT

No patient involved.

**STROBE Statement—Checklist of items that should be included in reports of *observational studies*.**

|                              | Item No | Recommendation                                                                                                                                                                                               | Page No |
|------------------------------|---------|--------------------------------------------------------------------------------------------------------------------------------------------------------------------------------------------------------------|---------|
| <b>Title and abstract</b>    | 1       | (a) Indicate the study's design with a commonly used term in the title or the abstract                                                                                                                       | 5       |
|                              |         | (b) Provide in the abstract an informative and balanced summary of what was done and what was found                                                                                                          | 5       |
| <b>Introduction</b>          |         |                                                                                                                                                                                                              |         |
| Background/rationale         | 2       | Explain the scientific background and rationale for the investigation being reported                                                                                                                         | 6       |
| Objectives                   | 3       | State specific objectives, including any prespecified hypotheses                                                                                                                                             | 6       |
| <b>Methods</b>               |         |                                                                                                                                                                                                              |         |
| Study design                 | 4       | Present key elements of study design early in the paper                                                                                                                                                      | 6       |
| Setting                      | 5       | Describe the setting, locations, and relevant dates, including periods of recruitment, exposure, follow-up, and data collection                                                                              | 6-7     |
| Participants                 | 6       | (a) Give the eligibility criteria, and the sources and methods of selection of participants                                                                                                                  | 6-7     |
| Variables                    | 7       | Clearly define all outcomes, exposures, predictors, potential confounders, and effect modifiers. Give diagnostic criteria, if applicable                                                                     | 8       |
| Data sources/<br>measurement | 8*      | For each variable of interest, give sources of data and details of methods of assessment (measurement). Describe comparability of assessment methods if there is more than one group                         | 8       |
| Bias                         | 9       | Describe any efforts to address potential sources of bias                                                                                                                                                    | 8       |
| Study size                   | 10      | Explain how the study size was arrived at                                                                                                                                                                    | 8       |
| Quantitative variables       | 11      | Explain how quantitative variables were handled in the analyses. If applicable, describe which groupings were chosen and why                                                                                 | 8       |
| Statistical methods          | 12      | (a) Describe all statistical methods, including those used to control for confounding                                                                                                                        | 8       |
|                              |         | (b) Describe any methods used to examine subgroups and interactions                                                                                                                                          | 8       |
|                              |         | (c) Explain how missing data were addressed                                                                                                                                                                  | 8       |
|                              |         | (d) If applicable, describe analytical methods taking account of sampling strategy                                                                                                                           | NA      |
|                              |         | (e) Describe any sensitivity analyses                                                                                                                                                                        | NA      |
| <b>Results</b>               |         |                                                                                                                                                                                                              |         |
| Participants                 | 13*     | (a) Report numbers of individuals at each stage of study—eg numbers potentially eligible, examined for eligibility, confirmed eligible, included in the study, completing follow-up, and analysed            | 8       |
|                              |         | (b) Give reasons for non-participation at each stage                                                                                                                                                         | 8       |
|                              |         | (c) Consider use of a flow diagram                                                                                                                                                                           | NA      |
| Descriptive data             | 14*     | (a) Give characteristics of study participants (eg demographic, clinical, social) and information on exposures and potential confounders                                                                     | 8       |
|                              |         | (b) Indicate number of participants with missing data for each variable of interest                                                                                                                          | 8       |
| Outcome data                 | 15*     | Report numbers of outcome events or summary measures                                                                                                                                                         | 9       |
| Main results                 | 16      | (a) Give unadjusted estimates and, if applicable, confounder-adjusted estimates and their precision (eg, 95% confidence interval). Make clear which confounders were adjusted for and why they were included | 9       |
|                              |         | (b) Report category boundaries when continuous variables were categorized                                                                                                                                    | 9       |
|                              |         | (c) If relevant, consider translating estimates of relative risk into absolute risk for a meaningful time period                                                                                             | NA      |
| Other analyses               | 17      | Report other analyses done—eg analyses of subgroups and interactions, and sensitivity analyses                                                                                                               | NA      |

|                          |    |                                                                                                                                                                            |    |
|--------------------------|----|----------------------------------------------------------------------------------------------------------------------------------------------------------------------------|----|
| <b>Discussion</b>        |    |                                                                                                                                                                            |    |
| Key results              | 18 | Summarise key results with reference to study objectives                                                                                                                   | 9  |
| Limitations              | 19 | Discuss limitations of the study, taking into account sources of potential bias or imprecision. Discuss both direction and magnitude of any potential bias                 | 10 |
| Interpretation           | 20 | Give a cautious overall interpretation of results considering objectives, limitations, multiplicity of analyses, results from similar studies, and other relevant evidence | 10 |
| Generalisability         | 21 | Discuss the generalizability (external validity) of the study results                                                                                                      | 10 |
| <b>Other information</b> |    |                                                                                                                                                                            |    |
| Funding                  | 22 | Give the source of funding and the role of the funders for the present study and, if applicable, for the original study on which the present article is based              | 2  |

For peer review only

1  
2  
3  
4  
5  
6  
7  
8  
9  
10  
11  
12  
13  
14  
15  
16  
17  
18  
19  
20  
21  
22  
23  
24  
25  
26  
27  
28  
29  
30  
31  
32  
33  
34  
35  
36  
37  
38  
39  
40  
41  
42  
43  
44  
45  
46  
47  
48  
49  
50  
51  
52  
53  
54  
55  
56  
57  
58  
59  
60

***Treatment persistence and exacerbations in asthmatic patients initiating treatment with inhaled corticosteroids and long-acting beta2-adrenergic agonists (ICS/LABA): a real-life study.***

**ABSTRACT**

**Objective.** To determine treatment persistence and exacerbations in patients initiating inhaler treatment with fixed-dose combinations of inhaled corticosteroids/long-acting beta2-adrenergic agonists (ICS/LABA) for the treatment of asthma.

**Design.** Observational study conducted by review of medical records.

**Setting.** Longitudinal cohort. The follow-up period was one year.

**Participants** The study included patients aged  $\geq 18$  years who started treatment with ICS/LABA and met the inclusion/exclusion criteria.

**Main outcomes and measures.** The study groups were fluticasone propionate/salmeterol (FP/SAL), beclomethasone/formoterol (BDP/FORM), budesonide/formoterol (BUD/FORM), fluticasone furoate/vilanterol (FF/VI) and fluticasone propionate/formoterol (FP/FORM). The main measurements were persistence, medication possession ratio (MPR), and exacerbations. Statistical significance was established as  $p < 0.05$ .

**Results.** In total, 3,203 patients were extracted from a database: by groups, 31.1% FP/SAL, 28.6% BDP/FORM, 25.0% BUD/FORM, 8.2% FF/VI, and 7.0% FP/FORM. The mean age was 52.2 years, 60.8% were female, and 44.9% had persistent-moderate asthma. Treatment persistence was 61.7% (95% CI: 60.0-63.4%) and by study groups it was: FP/SAL: 60.7%, BDP/FORM: 61.2%, BUD/FORM: 60.3%, FF/VI: 66.7% and FP/FORM: 67.6%, ( $p=0.046$ ). MPR by study group was FP/SAL: 74.3, BDP/FORM: 73.8%, BUD/FORM: 74.6%, FF/VI: 79.4% and FP/FORM: 80.6% ( $p=0.028$ ). The mortality rate was 2.9%. By treatment group, exacerbations were FP/SAL 21.9%, BDP/FORM 22.2%, BUD/FORM 22.8%, FF/VI 17.9% and FP/FORM 16% ( $p=0.036$ ).

**Conclusions.** Patients undergoing treatment with FP/FORM and FF/VI were associated with greater treatment adherence (persistence, MPR) and lower rates of exacerbations. The differences may be due to the pharmacological properties of the drugs or other, unmeasured factors.

**Keywords:** asthma, persistence, exacerbations, ICS/LABA.



## INTRODUCTION

Asthma is a chronic inflammatory airway disease that courses with bronchial hyper-response and variable airflow blockage<sup>1</sup>. In Spain, the prevalence is around 5%, although there are variations between geographical areas<sup>2</sup>. Most patients achieve adequate control with inhaled corticosteroids (ICS) and long-lasting beta-adrenergic agonists (LABA), although some patients require additional therapy with other medications, including oral corticosteroids (OC)<sup>1-2</sup>.

Reducing the risk of exacerbations is an important goal of asthma treatment<sup>3</sup>. It is estimated that 36% of patients with asthma have exacerbations of varying intensity<sup>2,6</sup>. Factors influencing an increased risk of exacerbations include previous exacerbations, poor asthma control, limitations on activity, lower forced expiratory volume in the first second (FEV<sub>1</sub>), exposure to allergens, difficulty handling inhalation devices and treatment adherence<sup>7</sup>. Studies show anti-asthmatic adherence rates of <65%<sup>1-2,7</sup>. The most common cause of treatment discontinuation are side effects, improvements in symptoms and problems in reducing the effect of the drug over time, which lead to discontinuation being advised or spontaneous abandonment<sup>7-10</sup>.

In Spain, there are few studies evaluating the relationship between the adherence rate and the risk of exacerbations<sup>11</sup>. Persistence (or discontinuation) of treatment is a key factor in disease progression and the risk of complications. In addition, there is a growing need to conduct studies representative of the real-life clinical conditions in which medicines are used, so the study may be of interest. The objective of the study was to evaluate treatment persistence and exacerbations in patients initiating inhaler treatment with combinations of ICS/LABA for the treatment of asthma in routine clinical practice.

## PATIENTS AND METHODS

An observational, multicenter, longitudinal, retrospective study was carried out by review of medical records (computerized databases, with dissociated data). The study population was obtained from the computerized records of health care providers from various primary care centers (PCC) in Catalonia (unified in the dissociated database of the Fundacion RedISS (Health services research network; [www.rediss.es](http://www.rediss.es)). The data came from the OMIAPWIN computerized medical record and other complementary databases. The population assigned to the centers was mostly urban, of medium-low socioeconomic level.

Patients who sought care and initiated treatment with a fixed dose ICS/LABA combination between 01/01/2015 and 30/06/2016 (recruitment period, index date) were included in the study. The inclusion criteria were: (a)  $\geq 18$  years, (b) patients diagnosed with asthma  $\geq 12$  months before the index date, c) inclusion in the prescription program (with recorded dose, time interval and duration of each treatment administered;  $\geq 2$  prescriptions during the follow-up period), and (d) ensured

1 regular monitoring ( $\geq 2$  clinical records in the computer system). Exclusion criteria were: (a) patients  
2 transferred to other centers, displaced or out-of-area, (b) permanently institutionalized patients, (c)  
3 a history of COPD, pulmonary emphysema, bronchiectasis, cystic fibrosis or bronchial neoplasm,  
4 and d) mixed asthma-COPD phenotype (asthma-COPD overlap)<sup>1</sup>.  
5  
6  
7

8  
9  
10 Five study groups were differentiated according to the initial fixed-dose combination of ICS/LABA:  
11 Budesonide /formoterol (BUD/FORM, R03AK07), Beclomethasone /formoterol (BDP/FORM,  
12 R03AK08), Fluticasone furoate/vilanterol (FF/VI, R03AK10), Fluticasone propionate/formoterol  
13 (FP/FORM, R03AK11) and Fluticasone propionate/salmeterol (FP/SAL, R03AK06). The follow-up  
14 period, from the date of inclusion of the patient was one year. Records of asthma patients were  
15 obtained using the International Classification of Primary Care in the European Community (ICPC-  
16 2; R93)<sup>12</sup>, and/or the International Classification of Diseases (ninth edition) Clinical Modification  
17 (ICD-9-MC; 493.x for asthma and/or flare-ups). The diagnosis of asthma was always made at the  
18 physician's discretion, according to spirometry values. Exacerbations were defined as an event in  
19 the natural course of the disease characterized by acute episodes identified by a progressive  
20 increase in breathing difficulties, feeling short of breath, wheezing, chest oppression or a  
21 combination of these symptoms, caused by intense airflow obstruction<sup>1</sup>. Outpatients or those  
22 attending the emergency department (mild-moderate asthma exacerbation) and hospitalized  
23 patients (severe asthma exacerbation) were identified. The record of each exacerbation was  
24 obtained to assess the rates before and after the index date, and the time from diagnosis (in years).  
25 In addition, the following variables were collected: body mass index (BMI, kg/m<sup>2</sup>), lung function  
26 (forced expiratory volume in the first second, FEV<sub>1</sub>), asthma severity (intermittent, mild persistent,  
27 moderate persistent and severe persistent according to the GEMA criteria<sup>1</sup> at the start of the study  
28 before the index date. All-cause deaths were recorded.  
29  
30  
31  
32  
33  
34  
35  
36  
37  
38  
39  
40

41 Sociodemographic and comorbidity variables collected were age (continuous and by range), sex,  
42 and the personal history described in table 1. As a summary variable of general comorbidity: a) the  
43 Charlson<sup>13</sup> comorbidity index was used as an approximation to severity, b) the number of chronic  
44 comorbidities was obtained, and c) the individual case-mix index was obtained from the Adjusted  
45 Clinical Groups (ACG), which is a patient classification system using iso-consumption of  
46 resources<sup>14</sup>. The ACG application provides resource utilization bands (RUB), allowing each patient  
47 to be grouped into one of five mutually exclusive categories based on their overall morbidity.  
48  
49  
50  
51  
52

53 The medicines (active substances) indicated for treatment were obtained according to the  
54 Anatomical Therapeutic Chemical Classification System (ATC)<sup>15</sup> classification: oral/systemic  
55 corticosteroids (CO, H02AB), short-lasting beta-2 agonists (SABA, R03AC), systemic beta-2  
56 agonists (xanthines, R03\*), leukotriene receptor antagonists (R03DC), anticholinergics (LAMA,  
57 R03BB04: tiotropium bromide) and omalizumab (biologicals, R03DX05). In addition, patients  
58  
59  
60

1 receiving chronic doses of long-lasting oral/systemic corticosteroids were differentiated from those  
2 receiving them only for stabilization of an exacerbation. The choice of drug for a specific patient  
3 was at the discretion of the physician, as in routine clinical practice. The information was obtained  
4 from drug dispensing records. The scheduled dose of ICS administered was classified at low,  
5 medium or high<sup>1</sup>. Treatment persistence was calculated from the index date to the discontinuation  
6 date in months. The discontinuation date was the date on which the patient switched to another  
7 ICS/LABA or interrupted treatment for  $\geq 60$  days without renewing the medication and/or had  $\geq 2$   
8 prescriptions dispensed. The rate of treatment persistence was obtained at 6 and 12 months of  
9 follow-up. The percentage of therapeutic compliance was calculated based on the medicine  
10 possession ratio (MPR)<sup>16</sup>. This was evaluated from the first to the last prescription and represented  
11 the number of days of medication dispensed according to the number of days on treatment from  
12 the index date.

22 Records were validated to ensure the quality of the results. A descriptive-univariate statistical  
23 analysis was carried out. Qualitative data were described using absolute and relative frequencies  
24 and quantitative data as means and standard deviation (SD). The 95% confidence intervals (CI)  
25 used to estimate parameters were based on the total number of subjects with no missing values.  
26 The normality of the distribution was assessed using the Kolmogorov-Smirnov test. In the bivariate  
27 analysis, ANOVA, the Chi squared test and comparison of means were used for paired data. A  
28 multiple linear regression model was used to obtain the variables associated with the number of  
29 exacerbations (dependent variables; procedure: consecutive steps). The covariates included in the  
30 model were: sex, age, general comorbidity (RUB), FEV<sub>1</sub>, disease duration and asthma severity.  
31 Persistence was assessed using Kaplan-Meier curves (Log rank procedure; Mantel-Cox). The  
32 analysis was made using SPSSWIN version 23. Statistical significance was established as  $p < 0.05$ .

41 *Ethics Approval: His protocol was reviewed and approved at Foundation Redis (Ethical Research*  
42 *Committee; International University of Catalonia; code: ANT-PER-2017-01).*

44 *Patient and public involvement: no patient involved.*

## 47 RESULTS

48 Of an initial population of 8,725 subjects diagnosed with asthma (prevalence: 5.4%; 95% CI: 5.2-  
49 5.7%), 3,203 patients who met the inclusion/exclusion criteria and could be followed during the  
50 study period were analysed. Table 1 shows the baseline characteristics of participants according to  
51 the five ICS/LABA study groups. The mean age was 52.2 years, 60.8% were women, the mean  
52 RUB was 2.9 points, and the mean Charlson index was 0.7 points. Allergic rhinitis (62.3%),  
53 dyslipidemia (41%), gastroesophageal reflux (39.6%) and high blood pressure (28.4%) were the  
54 most frequent comorbidities: 44.9% of patients had persistent-moderate asthma, with a mean FEV<sub>1</sub>  
55 of 74.6%. According to the initial ICS/LABA prescribed, the study groups were as follows: 31.1%

(N=996) FP/SAL, 28.6% (N=917) BDP/FORM, 25% (N=802) BUD/FORM, 8.2% (N=263) FF/VI and 7.0% (N=225) FP/FORM. There was acceptable comparability in the baseline characteristics of the study groups.

Medication administered and treatment adherence (persistence and MPR) during the follow-up period according to the study groups are detailed in table 2: 95.7% of patients were receiving short-term beta-2 agonists (SABA) as rescue treatment, 27.7% were receiving oral corticosteroids (20% for regular/chronic use) and 18.2% leukotriene antagonists. There was acceptable homogeneity between the groups. Treatment persistence at 12 months was 61.7% (95% CI: 60-63.4%) and, by study group, was as follows: FP/SAL: 60.7%, BDP/FORM: 61.2%, BUD/FORM: 60.3%, FF/VI: 66.7% and FP/FORM: 67.6% ( $p=0.046$ ). The MPR was FP/SAL: 74.3%, BDP/FORM: 73.8%, BUD/FORM: 74.6%, FF/VI: 79.4% and FP/FORM: 80.6% ( $p=0.028$ ). The mortality rate was 2.9%.

Exacerbations by study group are described in table 3. Overall, 21.5% of patients had some form of exacerbation, and the rates were slightly lower in groups treated with FP/FORM and FF/VI. The percentages of patients with exacerbations according to study group were FP/SAL: 21.9%, BDP/FORM: 22.2%, BUD/FORM: 22.8%, FF/VI: 17.9% and FP/FORM: 16% ( $p=0.036$ ). The differences were most evident in patients with severe exacerbations (7.9%, 6.0%, 7.9%, 6.8% and 4.0%, respectively ( $p<0.001$ )). The reductions in exacerbations from baseline to 12 months were: FP/SAL: -6.8%, BDP/FORM: -5.9%, BUD/FORM: -6.1%, FF/VI: -8.6% and FP/FORM: -9.3%, respectively ( $p=0.037$ ). In the multivariate model, the number of exacerbations during the follow-up was associated with previous exacerbations ( $\beta=0.798$ ), FEV<sub>1</sub> ( $\beta=0.075$ ) and persistence ( $\beta=0.011$ ) ( $p<0.033$ ). The model determination coefficient was 85.1%. Figure 1 details the percentage of exacerbations according to asthma severity and figure 2 shows the median treatment persistence during the follow-up period.

## DISCUSSION

The results of the study show that patients initiating fixed-dose treatment with FP/FORM and FF/VI were associated with increased persistence and MPR, resulting in fewer exacerbations compared with other ICS/LABA. Only patients receiving FP/FORM were associated with a lower rate of severe asthma exacerbations. FP/FORM and FF/VI, which are newer combinations, were less often prescribed (7% and 8.2%, respectively).

ICS /LABA are the basis of persistent asthma treatment, although the literature reviewed shows a low rate of adherence to medication (<65% per year)<sup>11,16-17</sup>. A review of 19 studies shows treatment adherence ranged between 22% and 63% and that 24% of exacerbations and 60% of asthma-related hospitalizations were attributable to poor adherence<sup>18</sup>. Zhang<sup>19</sup> found a persistence of 33.6% in children with persistent asthma on monotherapy. Our results are similar or perhaps slightly

1 higher than those reported but are still low. There may be several possible explanations: a) the  
2 method of measuring persistence/MPR, b) the dose indicated at the beginning of the study, c) ours  
3 is a more recent study, d) the patients who sought care assiduously attended check-ups, and/or e)  
4 are subject to specific nursing follow-up. In addition, in the studies reviewed, therapeutic non-  
5 compliance was associated with young patients with mild asthma, while fixed combinations improve  
6 adherence, as confirmed by our results<sup>18,20</sup>.  
7  
8  
9  
10

11  
12 Our results show that 21.5% of patients had some form of exacerbation, and that the rate was  
13 slightly lower in patients treated with FP/FORM and FF/VI. The risk of exacerbations was associated  
14 with clinical severity (FEV<sub>1</sub>), previous exacerbations, limitations on activity, allergic rhinitis,  
15 insufficient preventive anti-inflammatory treatment and/or poor compliance with the prescribed  
16 treatment<sup>20</sup>. Schmidt<sup>21</sup>, in a year-long prospective observational real-life study, found that treatment  
17 with FP/FORM was associated with clinical improvements in asthma (degree of control, severe  
18 exacerbation, quality of life and lung function). Usmani<sup>22</sup> studied patients with controlled asthma  
19 and found that a reduction in the dose of FP/FORM did not affect exacerbations and was well  
20 tolerated. A comparative review of the rate of severe asthma exacerbations observed in clinical  
21 trials of different fixed-dose combinations of ICS/LABA by Papi<sup>20</sup> found that the incidence of  
22 exacerbations with FP/FORM was lower than that for other combinations of ICS/LABA (especially  
23 those that result in hospitalization) and that the difference cannot be explained solely by the  
24 characteristics of the studies (design, population, etc.) and could be related to the pharmacological  
25 (molecular) characteristics of the combination. A clinical trial of FF/VI also found a lower rate of  
26 asthma exacerbations, although it was similar to FP/SAL<sup>23</sup>. Another recent real-life trial found that  
27 FF/VI showed better asthma control than habitual optimized treatment, but that there were no  
28 differences in the rate of asthma exacerbations<sup>24</sup>. With design limitations, our data is in line with the  
29 literature consulted<sup>20,25</sup>. However, the different definitions of asthma exacerbation make  
30 comparisons difficult; in our study the definition of exacerbation was at the clinician's discretion and  
31 was based on the use of health resources.  
32  
33  
34  
35  
36  
37  
38  
39  
40  
41  
42  
43  
44  
45

46 The study has some limitations. These affect the categorization of the disease and the possible  
47 classification bias of patients, including the possible inaccuracy of diagnostic coding with regard to  
48 the diagnosis of asthma and other comorbidities, the definition of exacerbation, the imbalance  
49 between the groups in terms of numbers, or the lack of variables that might influence the results  
50 (socioeconomic level of patients, environmental/work exposure, evolution of the prescribed  
51 pharmacological dose, verification of the inhalation technique, including bronchoconstrictor therapy  
52 and/or the differentiation of phenotypes) should also be considered as limitations. In addition, the  
53 external validity of the results with respect to the representativeness of the population and the small  
54 number of patients per study group should also be considered as limitations. When using an  
55  
56  
57  
58  
59  
60

1 efficient inhaler therapy<sup>24-25</sup>, the factors that most influence compliance include the type of device,  
2 the technique used, and the health-education instructions received.  
3  
4  
5

6 The future perspectives offered by this study are those of its replication in other health institutions  
7 and interventional strategies aimed at promoting patient self-care (structured and individualized  
8 educational programs). In conclusion, patients receiving FP/FORM and FF/VI were associated with  
9 increased treatment adherence (persistence, MPR) and lower rates of exacerbations. These  
10 differences could be due to the pharmacological properties of the drugs or other unmeasured  
11 factors. However, further studies will be needed to strengthen the consistency of the results.  
12  
13  
14  
15  
16

## 17 REFERENCES

- 18 1. Spanish guide to asthma management (GEMA<sup>4,2</sup>). Version 2017. Available at: <https://www.gemasma.com>. Accessed: January 2020.
- 19 2. Vila-Rigat R, Panads Valls R, Hernandez Huet E, et al. Prevalence of Work-Related Asthma and its  
20 Impact in Primary Health Care. *Arch Bronconeumol*. 2015;51:449-55.
- 21 3. JR Castle, Peters SP, Busse WW. Asthma Exacerbations: Pathogenesis, Prevention, and Treatment.  
22 *J Allergy Clin Immunol Pract*. 2017;5:918-27.
- 23 4. Stenson EK, Tchou MJ, Wheeler DS. Management of acute asthma exacerbations. *Curr Opin Pediatr*.  
24 2017;29:305-10.
- 25 5. Quirce S, Delgado J, Entrenas LM, et al.; ASMAFORUM II Group. Quality Indicators of Asthma Care  
26 Derived From the Spanish Guidelines for Asthma Management (GEMA 4.0): A Multidisciplinary Team  
27 Report. *J Investig Allergol Clin Immunol*. 2017;27:69-73.
- 28 6. Engelkes M, Janssens HM, de Jongste JC, Sturkenboom MC, Verhamme KM. Medication adherence  
29 and the risk of severe asthma exacerbations: a systematic review. *Eur Respir J*. 2015;45:396-407.
- 30 7. Darba J, Ramírez G, Sicras A, García-Bujalance L, Torvinen S, Sánchez-de la Rosa R. Identification  
31 of factors involved in medication compliance: incorrect inhaler technique of asthma treatment leads to  
32 poor compliance. *Patient Prefer Adherence*. 2016;10:135-45.
- 33 8. Sicras-Mainar A, Huerta A, Sánchez D, Navarro-Artieda R. Use of resources and costs associated  
34 with non-adherence to inhaled corticosteroid treatment in asthma. *Semergen*. 2018;44:13-22.
- 35 9. Vasbinder EC, Belitser SV, Souverein PC, van Dijk L, Vulto AG, van den Bemt PM. Non-adherence  
36 to inhaled corticosteroids and the risk of asthma exacerbations in children. *Patient Prefer Adherence*.  
37 2016; 10:531-8.
- 38 10. Dima AL, Hernandez G, Cunillera O, Ferrer M, de Bruin M; ASTRO-LAB group. Asthma inhaler  
39 adherence determinants in adults: systematic review of observational data. *Eur Respir J*. 2015;45:994-  
40 1018.
- 41 11. Sicras-Mainar A, Traseira-Lugilde S, Fernández-Sánchez T, Navarro-Artieda R. Treatment  
42 persistence and resources use with inhaled fixed-dose combinations of corticosteroids and long-acting  
43  $\beta$ -adrenergic agonists for the treatment of asthma: A population-based retrospective study. *Semergen*.  
44 2018;44(7):472-484.
- 45 12. Lamberts H, Wood M, Hofmans-Okkes AM (eds). The International Classification of Primary Care in  
46 the European Community. With a multi-language layer. Oxford: Oxford University Press, 1993.
- 47  
48  
49  
50  
51  
52  
53  
54  
55  
56  
57  
58  
59  
60

13. Charlson ME, Pompei P, Ales KL, Mackenzie CR. A new method of classifying prognostic comorbidity in longitudinal studies: development and validation. *J Chronic Dis*. 1987;40:373-383.
14. Sicras-Mainar A, Navarro-Artieda R. Adjusted clinical groups: a patient classification system through risk adjustment. *Rev Med Exp Public Health*. 2013;30:308-14.Peru
15. The Anatomical Therapeutic Chemical Classification System with Defined Daily Doses (ATC/DDD): World Health Organization. Available at: [http://www.who.int/classifications /atcddd/en/](http://www.who.int/classifications/atcddd/en/). Accessed: 10/04/2020.
16. Mattke S, Martorell F, Hong SY, Sharma P, Cuellar A, Lurie N. Anti-inflammatory medication adherence and cost and utilization of asthma care in a commercially insured population. *J Asthma*. 2010;47:323-9.
17. Voshaar T, Kostev K, Rex J, Schroder-Bernhardi D, Maus J, Munzel U. A retrospective database analysis on persistence with inhaled corticosteroid therapy: comparison of two dry powder inhalers during asthma treatment in Germany. *Int J Clin Pharmacol Ther*. 2012;50:257-64.
18. Bårnes CB, Ulrik CS. Asthma and Adherence to Inhaled Corticosteroids: Current Status and Future Perspectives. *Respiratory Care*. 2015;60(3):455-68.
19. Zhang Q, Taylor SD, Sazonov V, Thomas M, Price D. Suboptimal persistence with inhaled corticosteroid monotherapy among children with persistent asthma in the in the UK. *Prim Care Respir J*. 2011;20:97-101.
20. Daddy A, Mansur AH, Pertseva T, Kaiser K, McIver T, Grothe B, Dissanayake S. Long-Term Fluticasone Propionate/Formoterol Fumarate Combination Therapy Is Associated with a Low Incidence of Severe Asthma Exacerbations. *J Aerosol Med Lung Drug Deliv*. 2016;29:346-61.
21. Schmidt O, Petro W, Hoheisel G, Kannies F, Oepen P, Langer-Brauburger B. Real-life effectiveness of asthma treatment with a fixed-dose fluticasone/formoterol pressurised metered-dose inhaler - Results from a non-interventional study. *Respir Med*. 2017;131:166-174.
22. Usmani OS, Kemppinen A, Gardener E, et al. A Randomized Pragmatic Trial of Changing and Stepping Down Fluticasone/Formoterol in Asthma. *J Allergy Clin Immunol Pract*. 2017;5:1378-87.
23. Woodcock A, Bleecker ER, Lotvall J, et al. Efficacy and safety of fluticasone furoate/vilanterol compared with fluticasone propionate/salmeterol combination in adult and adolescent patients with persistent asthma: a randomized trial. *Chest*. 2013;144:1222-9.
24. Woodcock A, Vestbo J, Bakerly ND, et al.; Salford Lung Study Investigators. Effectiveness of fluticasone furoate plus vilanterol on asthma control in clinical practice: an open-label, parallel group, randomised controlled trial. *Lancet*. 2017;390:2247-55.
25. Shower FM, Ni Chroinin M, Greenstone I, Lasserson TJ. Addition of long-acting beta2-agonists to inhaled steroids versus higher dose inhaled steroids in adults and children with persistent asthma. *Cochrane Database Syst Rev*. 2010;(4):CD005533.
26. Lewis A, Torvinen S, Dekhuijzen PNR, Chrystyn H, Watson AT, Blackney M, Plich A. The economic burden of asthma and chronic obstructive pulmonary disease and the impact of poor inhalation technique with commonly prescribed dry powder inhalers in three European countries. *BMC Health Services Research*. 2016;16:251.
27. Normansell R, Kew KM, Stovold E. Interventions to improve adherence to inhaled steroids for asthma. *Cochrane Database Syst Rev*. 2017;4:CD012226.

Table 1. Baseline characteristics of the series studied by study groups

| Study groups                     | FP/SAL        | BDP/FORM      | BUD/FORM      | FF/VI        | FP/FORM     | p     |
|----------------------------------|---------------|---------------|---------------|--------------|-------------|-------|
| Number of patients, %            | N=996 (31.1%) | N=917 (28.6%) | N=802 (25.0%) | N=263 (8.2%) | N=225 (7%)  |       |
| <i>Sociodemographic features</i> |               |               |               |              |             |       |
| Mean age, years                  | 52.3 (19.3)   | 53.0 (18.5)   | 51.0 (16.8)   | 52.5 (17.7)  | 52.8 (17.1) | 0.245 |
| Sex (female)                     | 60.0%         | 61.1%         | 61.6%         | 61.6%        | 60.4%       | 0.968 |
| <i>General comorbidity</i>       |               |               |               |              |             |       |
| Mean diagnoses                   | 6.8 (3.9)     | 6.4 (3.9)     | 6.2 (3.6)     | 6.3 (3.6)    | 6.8 (3.8)   | 0.075 |
| Charlson index                   | 0.8 (0.8)     | 0.7 (0.8)     | 0.7 (0.6)     | 0.7 (0.8)    | 0.8 (0.9)   | 0.097 |
| Mean RUB                         | 3.0 (0.7)     | 2.9 (0.7)     | 2.9 (0.8)     | 3.0 (0.8)    | 2.9 (0.7)   | 0.198 |
| 1 (very low comorbidity)         | 4.1%          | 3.6%          | 8.2%          | 6.1%         | 4.9%        |       |
| 2 (low comorbidity)              | 10.3%         | 20.4%         | 12.5%         | 13.3%        | 12.0%       |       |
| 3 (moderate comorbidity)         | 71.1%         | 65.5%         | 63.1%         | 56.7%        | 67.6%       |       |
| 4 (high comorbidity)             | 14.0%         | 9.9%          | 15.8%         | 23.6%        | 14.7%       |       |
| 5 (very high comorbidity)        | 0.5%          | 0.5%          | 0.4%          | 0.4%         | 0.9%        | 0.111 |
| <i>Associated comorbidity</i>    |               |               |               |              |             |       |
| High blood pressure              | 29.9%         | 28.9%         | 29.1%         | 29.3%        | 29.3%       | 0.991 |
| Diabetes mellitus                | 13.4%         | 12.8%         | 13.0%         | 13.3%        | 12.9%       | 0.996 |
| Dyslipidemia                     | 41.0%         | 41.3%         | 41.3%         | 40.7%        | 39.8%       | 0.811 |
| Obesity                          | 27.9%         | 28.6%         | 27.7%         | 26.2%        | 27.6%       | 0.963 |
| Ischemic heart disease           | 4.3%          | 4.0%          | 4.0%          | 3.8%         | 4.0%        | 0.994 |
| Cerebrovascular accident         | 7.3%          | 7.0%          | 7.0%          | 6.8%         | 6.7%        | 0.995 |
| Cardiovascular event             | 11.8%         | 9.2%          | 9.1%          | 10.6%        | 10.2%       | 0.272 |
| Depressive syndrome              | 19.5%         | 19.6%         | 20.2%         | 20.9%        | 20.4%       | 0.982 |
| Malignancies                     | 10.9%         | 10.5%         | 10.3%         | 11.8%        | 10.2%       | 0.964 |
| Allergic rhinitis                | 61.7%         | 63.1%         | 61.8%         | 63.5%        | 62.2%       | 0.959 |
| Nasal polyposis                  | 15.5%         | 15.4%         | 15.3%         | 14.1%        | 16.4%       | 0.969 |
| Gastroduodenal reflux            | 39.1%         | 40.9%         | 38.0%         | 41.1%        | 40.9%       | 0.739 |
| <i>Asthma severity</i>           |               |               |               |              |             |       |
| Intermittent                     | 13.0%         | 14.9%         | 12.0%         | 12.5%        | 12.0%       |       |
| Mild persistent                  | 25.0%         | 21.5%         | 24.6%         | 25.1%        | 25.3%       |       |
| Moderate persistent              | 44.5%         | 45.1%         | 45.3%         | 43.3%        | 45.4%       |       |
| Severe/severe persistent         | 17.6%         | 18.4%         | 18.2%         | 19.0%        | 18.2%       | 0.844 |
| <i>Other variables</i>           |               |               |               |              |             |       |
| BMI, kg/m <sup>2</sup>           | 28.4 (5)      | 28.6 (5.0)    | 28.4 (5.0)    | 28.6 (5.5)   | 27.9 (4.9)  | 0.228 |
| FEV <sub>1</sub> (% theoretical) | 74.8%         | 74.3%         | 74.7%         | 74.6%        | 74.8%       | 0.954 |

Values expressed as percentage or mean (standard deviation), p: statistical significance. RUB: Resource utilization bands.

BMI: Body mass index, kg/m<sup>2</sup>, FEV<sub>1</sub>: Forced expiratory volume in the first second.

Groups: Fluticasone propionate/salmeterol (FP/SAL), Beclomethasone /formoterol (BDP/FORM), Budesonide/formoterol (BUD/FORM), Fluticasone furoate/vilanterol (FF/VI) and Fluticasone propionate /formoterol (FP/FORM).



Table 2. Medication administered and treatment persistence during the follow-up period

| Study groups                         | FP/SAL        | BDP/FORM      | BUD/FORM    | FF/VI        | FP/FORM      | p     |
|--------------------------------------|---------------|---------------|-------------|--------------|--------------|-------|
| Number of patients, %                | N=996 (31.1%) | N=917 (28.6%) | N=802 (25%) | N=263 (8.2%) | N=225 (7.0%) |       |
| <i>Medication use</i>                |               |               |             |              |              |       |
| Oral corticosteroids                 | 24.6%         | 22.8%         | 26.7%       | 25.5%        | 24.9%        | 0.465 |
| Oral corticosteroids for chronic use | 22.0%         | 18.5%         | 20.2%       | 18.6%        | 18.7%        | 0.373 |
| Systemic antibiotics                 | 10.0%         | 9.2%          | 10.1%       | 10.3%        | 10.1%        | 0.959 |
| Short-lasting beta-2 agonists        | 90.0%         | 93.0%         | 91.2%       | 89.5%        | 92.2%        | 0.221 |
| Long-lasting anticholinergics        | 17.0%         | 15.2%         | 13.8%       | 16.0%        | 13.8%        | 0.414 |
| Systemic beta-2 agonists (xanthines) | 3.8%          | 3.5%          | 3.2%        | 5.7%         | 3.1%         | 0.431 |
| Leukotriene receptor antagonists     | 17.7%         | 17.4%         | 19.5%       | 17.5%        | 19.6%        | 0.782 |
| Biologicals: omalizumab              | 1.3%          | 1.4%          | 1.2%        | 1.5%         | 1.3%         | 0.997 |
| <i>Inhaled corticosteroid doses</i>  |               |               |             |              |              |       |
| Low                                  | 10.5%         | 9.8%          | 10.1%       | 11.1%        | 10.7%        |       |
| Average                              | 47.1%         | 46.5%         | 45.0%       | 46.2%        | 47.1%        |       |
| High                                 | 42.4%         | 43.7%         | 44.9%       | 42.7%        | 42.2%        | 0.547 |
| <i>Other variables</i>               |               |               |             |              |              |       |
| Time from diagnosis, years           | 12.5 (4.5)    | 12.7 (4.4)    | 12.8 (4.2)  | 12.6 (3.9)   | 12.3 (3.9)   | 0.373 |
| Treatment possession, months         | 8.9 (3.6)     | 8.9 (3.4)     | 9.0 (3.3)   | 9.6 (3.3)*   | 9.7 (3.1)*   | 0.046 |
| Duration of treatment, months        | 9.9 (3.5)     | 9.7 (3.6)     | 10.0 (3.5)  | 10.2 (3.4)*  | 10.3 (3.2)*  | 0.036 |
| Medication possession rate           | 74.3%         | 73.8%         | 74.6%       | 79.4%*       | 80.6%*       | 0.028 |
| 95% CI                               | 71.6-77.0%    | 70.5-76.3%    | 71.6-77.6%  | 74.5-84.3%   | 75.4-85.8%   |       |
| <i>Treatment persistence, months</i> |               |               |             |              |              |       |
| 6 months                             | 81.9%         | 81.2%         | 82.4%       | 86.0%*       | 87.6%*       | 0.014 |
| 12 months                            | 60.7%         | 61.2%         | 60.3%       | 66.7%*       | 67.6%*       | 0.046 |
| Death                                | 3.0%          | 2.7%          | 3.1%        | 2.3%         | 2.7%         | 0.954 |

Values expressed as percentage or mean (SD: standard deviation), p: statistical significance. CI: Confidence intervals.

Groups: Fluticasone propionate /salmeterol (FP/SAL), Beclomethasone/formoterol (BDP/FORM), Budesonide/formoterol (BUD/FORM), Fluticasone furoate/vilanterol (FF/VI) and Fluticasone propionate/formoterol (FP/FORM). \*: Statistically significant results (observed > expected).

Table 3. Exacerbations by study groups

| Study groups                               | FP/SAL        | BDP/FORM      | BUD/FORM    | FF/VI        | FP/FORM    | pd     |
|--------------------------------------------|---------------|---------------|-------------|--------------|------------|--------|
| Number of patients, %                      | N=996 (31.1%) | N=917 (28.6%) | N=802 (25%) | N=263 (8.2%) | N=225 (7%) |        |
| <b>Follow-up period (one year)</b>         |               |               |             |              |            |        |
| Exacerbations, %                           | 21.9%         | 22.2%         | 22.8%       | 17.9%*       | 16.0%*     | 0.036  |
| Mean exacerbations                         | 0.4 (0.8)     | 0.4 (0.8)     | 0.4 (0.8)   | 0.3 (0.8)    | 0.3 (0.8)  | 0.087  |
| Number of exacerbations/year               |               |               |             |              |            |        |
| 0                                          | 78.1%         | 78.3%         | 77.2%       | 82.1%        | 84.0%      |        |
| 1                                          | 15.0%         | 14.9%         | 13.8%       | 9.9%         | 7.1%       |        |
| 2                                          | 2.9%          | 2.6%          | 5.5%        | 1.9%         | 5.3%       |        |
| 3+                                         | 4.0%          | 4.1%          | 3.5%        | 6.1%         | 3.6%       | <0.001 |
| <b>Patients with exacerbations</b>         |               |               |             |              |            |        |
| Mild-Moderate                              | 20.1%         | 21.7%         | 22.2%       | 17.5%*       | 16.0%*     | <0.001 |
| Severe (hospital admission)                | 7.9%          | 6.0%          | 7.9%        | 6.8%         | 4.0%*      | <0.001 |
| <b>Previous year</b>                       |               |               |             |              |            |        |
| Exacerbations, %                           | 28.7%         | 28.1%         | 28.9%       | 25.5%        | 25.3%      | 0.698  |
| Mean exacerbations                         | 0.5 (0.9)     | 0.5 (0.9)     | 0.5 (0.9)   | 0.5 (1.0)    | 0.4 (0.9)  | 0.973  |
| Number of exacerbations/year               |               |               |             |              |            |        |
| 0                                          | 71.3%         | 71.9%         | 71.1%       | 74.5%        | 74.7%      |        |
| 1                                          | 17.1%         | 15.3%         | 15.1%       | 14.1%        | 15.6%      |        |
| 2                                          | 5.9%          | 8.4%          | 9.1%        | 3.0%         | 2.7%       |        |
| 3+                                         | 5.7%          | 4.5%          | 4.7%        | 8.4%         | 7.1%       | <0.001 |
| <b>Patients with exacerbations</b>         |               |               |             |              |            |        |
| Mild-Moderate                              | 27.5%         | 27.4%         | 28.7%       | 24.1%        | 25.4%      | 0.111  |
| Severe (hospital admission)                | 11.7%         | 10.8%         | 12.2%       | 10.6%        | 10.7%      | 0.217  |
| <b>Differences between the two periods</b> |               |               |             |              |            |        |
| Exacerbations, %                           | -6.8%         | -5.9%         | -6.1%       | -8.6%*       | -9.3%*     | 0.037  |
| Mild-Moderate                              | -7.4%         | -5.7%         | -6.5%       | -7.6%        | -8.4%      | 0.282  |
| Severe (hospital admission)                | -3.8%         | -4.8%         | -4.4%       | -5.8%*       | -6.7%*     | 0.044  |

Values expressed as percentage or mean (SD: standard deviation), p: statistical significance.

Groups: Fluticasone propionate /salmeterol (FP/SAL), Beclomethasone/formoterol (BDP/FORM), Budesonide/formoterol (BUD/FORM), Fluticasone furoate/vilanterol (FF/VI) and Fluticasone propionate/formoterol (FP/FORM). \*: Statistically significant results (effects observed > expected).

Figure 1. Percentage of patients with exacerbations according to their severity

Values expressed as a percentage of patients with exacerbations during the follow-up year. In grey, statistically significant results ( $p < 0.05$ ). Groups: Fluticasone propionate /salmeterol (FP/SAL), Beclomethasone/formoterol (BDP/FORM), Budesonide/formoterol (BUD/FORM), Fluticasone furoate/vilanterol (FF/VI) and Fluticasone propionate/formoterol (FP/FORM).

For peer review only

Figure 2. Median treatment persistence during the follow-up period

Kaplan-Meier Curve: Log Rank Procedure (Mantel-Cox): Chi-square-9,643; p-0.039.

Groups: Fluticasone propionate /salmeterol (FP/SAL), Beclomethasone/formoterol (BDP/FORM), Budesonide/formoterol (BUD/FORM), Fluticasone furoate/vilanterol (FF/VI) and Fluticasone propionate /formoterol (FP/FORM).

For peer review only

1  
2  
3  
4  
5  
6  
7  
8  
9  
10  
11  
12  
13  
14  
15  
16  
17  
18  
19  
20  
21  
22  
23  
24  
25  
26  
27  
28  
29  
30  
31  
32  
33  
34  
35  
36  
37  
38  
39  
40  
41  
42  
43  
44  
45  
46  
47  
48  
49  
50  
51  
52  
53  
54  
55  
56  
57  
58  
59  
60

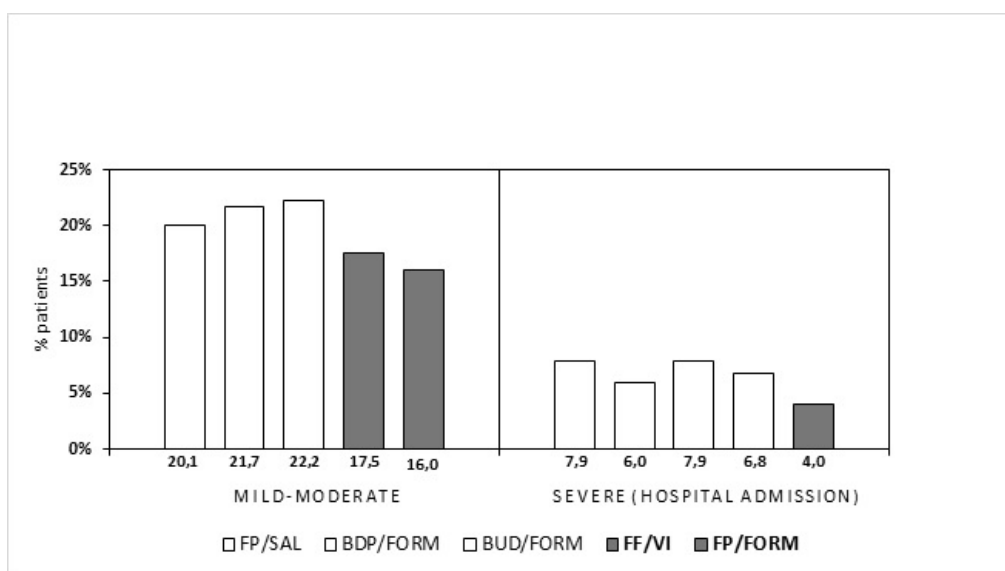

Figure 1. Percentage of patients with exacerbations according to their severity

171x97mm (96 x 96 DPI)

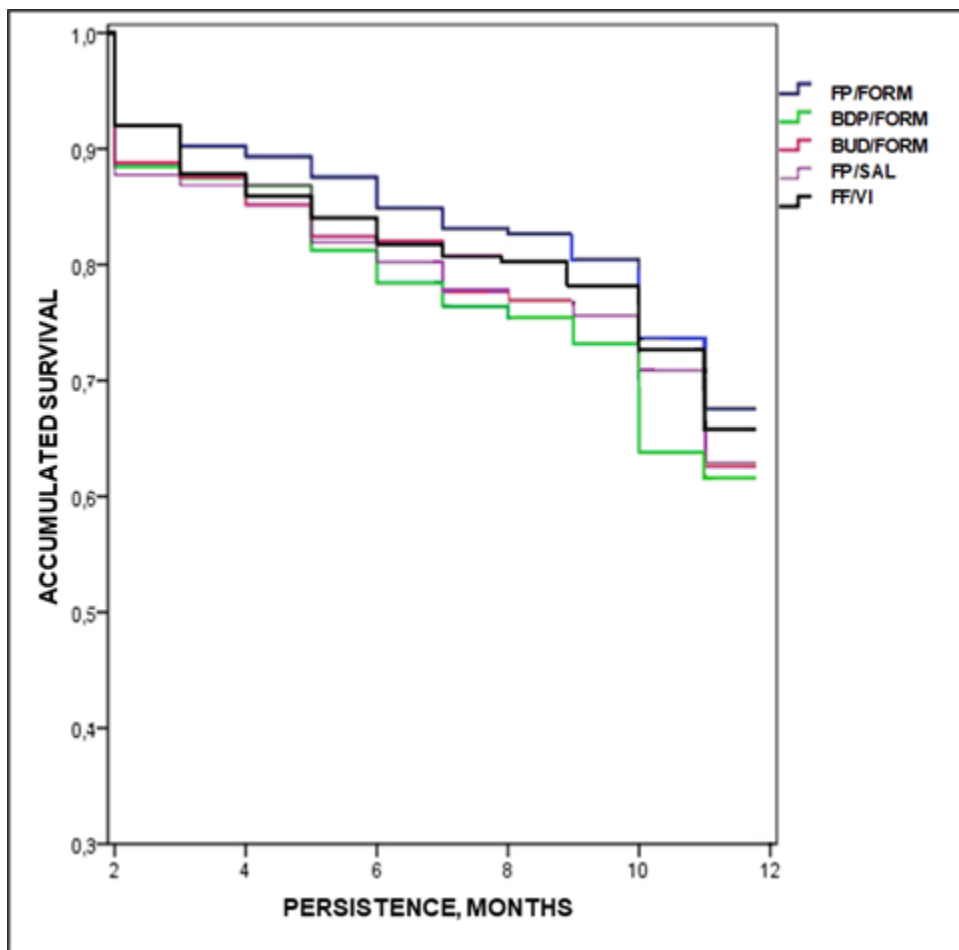

Figure 2. Median treatment persistence during the follow-up period

325x316mm (38 x 38 DPI)

# BMJ Open

## Treatment persistence and exacerbations in asthmatic patients initiating treatment with inhaled corticosteroids and beta-adrenergic agonists: retrospective cohort study

|                                 |                                                                                                                                                                                                                                                                                                                                                                                                                        |
|---------------------------------|------------------------------------------------------------------------------------------------------------------------------------------------------------------------------------------------------------------------------------------------------------------------------------------------------------------------------------------------------------------------------------------------------------------------|
| Journal:                        | <i>BMJ Open</i>                                                                                                                                                                                                                                                                                                                                                                                                        |
| Manuscript ID                   | bmjopen-2021-053964.R1                                                                                                                                                                                                                                                                                                                                                                                                 |
| Article Type:                   | Original research                                                                                                                                                                                                                                                                                                                                                                                                      |
| Date Submitted by the Author:   | 08-Feb-2022                                                                                                                                                                                                                                                                                                                                                                                                            |
| Complete List of Authors:       | Sicras-Mainar, Antoni; Atrys Health SA, HEOR<br>Gómez Rodríguez, Belén; University Hospital Virgen de la Victoria, Pulmonology Service<br>Traseira-Lugilde, Susana; Mundipharma Pharmaceuticals SL, Medical Department<br>Fernández-Sánchez, Toni; Mundipharma Pharmaceuticals SL, Medical Department<br>Velasco Garrido, José Luis; University Hospital Virgen de la Victoria, Virgen de la Victoria Hospital Complex |
| <b>Primary Subject Heading</b>: | General practice / Family practice                                                                                                                                                                                                                                                                                                                                                                                     |
| Secondary Subject Heading:      | Respiratory medicine                                                                                                                                                                                                                                                                                                                                                                                                   |
| Keywords:                       | Asthma < THORACIC MEDICINE, RESPIRATORY MEDICINE (see Thoracic Medicine), THERAPEUTICS                                                                                                                                                                                                                                                                                                                                 |
|                                 |                                                                                                                                                                                                                                                                                                                                                                                                                        |

SCHOLARONE™  
Manuscripts



I, the Submitting Author has the right to grant and does grant on behalf of all authors of the Work (as defined in the below author licence), an exclusive licence and/or a non-exclusive licence for contributions from authors who are: i) UK Crown employees; ii) where BMJ has agreed a CC-BY licence shall apply, and/or iii) in accordance with the terms applicable for US Federal Government officers or employees acting as part of their official duties; on a worldwide, perpetual, irrevocable, royalty-free basis to BMJ Publishing Group Ltd ("BMJ") its licensees and where the relevant Journal is co-owned by BMJ to the co-owners of the Journal, to publish the Work in this journal and any other BMJ products and to exploit all rights, as set out in our [licence](#).

The Submitting Author accepts and understands that any supply made under these terms is made by BMJ to the Submitting Author unless you are acting as an employee on behalf of your employer or a postgraduate student of an affiliated institution which is paying any applicable article publishing charge ("APC") for Open Access articles. Where the Submitting Author wishes to make the Work available on an Open Access basis (and intends to pay the relevant APC), the terms of reuse of such Open Access shall be governed by a Creative Commons licence – details of these licences and which [Creative Commons](#) licence will apply to this Work are set out in our licence referred to above.

Other than as permitted in any relevant BMJ Author's Self Archiving Policies, I confirm this Work has not been accepted for publication elsewhere, is not being considered for publication elsewhere and does not duplicate material already published. I confirm all authors consent to publication of this Work and authorise the granting of this licence.



**Treatment persistence and exacerbations in asthmatic patients initiating treatment with inhaled corticosteroids and beta-adrenergic agonists: retrospective cohort study**

Antoni Sicras-Mainar<sup>1</sup>  
 Belén Gómez Rodríguez<sup>2</sup>  
 Susana Traseira-Lugilde<sup>3</sup>  
 Toni Fernández-Sánchez<sup>3</sup>  
 José Luis Velasco Garrido<sup>2</sup>

[ansicras@atryshealth.com](mailto:ansicras@atryshealth.com)  
[belen.gomez.rodriguez.sspa@juntadeandalucia.es](mailto:belen.gomez.rodriguez.sspa@juntadeandalucia.es)  
[Susana.Traseira@mundipharma.es](mailto:Susana.Traseira@mundipharma.es)  
[Toni.Fernandez@mundipharma.es](mailto:Toni.Fernandez@mundipharma.es)  
[jvelascogarrido@hotmail.com](mailto:jvelascogarrido@hotmail.com)

1) Scientific Direction, Atrys Health, Barcelona. Spain.  
 2) Pulmonology Service. Virgen de la Victoria Hospital Complex, Malaga, Spain  
 3) Medical Department, Mundipharma Pharmaceuticals SL, Madrid, Spain

**CORRESPONDENCE:**

Antoni Sicras-Mainar  
 Atrys Health SA  
 C/Provença 392, bajos  
 08025 - Barcelona  
 T: +34 934 581 561, E-mail: [ansicras@atryshealth.com](mailto:ansicras@atryshealth.com)

**ABBREVIATIONS**

| Abbreviation     | Description                                           |
|------------------|-------------------------------------------------------|
| ATC              | Anatomical Therapeutic Chemical Classification System |
| BDP/FORM         | Beclomethasone/formoterol                             |
| BUD/FORM         | Budesonide/formoterol                                 |
| FEV <sub>1</sub> | Maximum expiratory volume in the first second         |
| FF/VI            | Fluticasone furoate/vilanterol                        |
| FP/FORM          | Fluticasone propionate/formoterol                     |
| FP/SAL           | Fluticasone propionate/salmeterol                     |
| ICS              | Inhaled corticosteroid                                |
| LABA             | Long-acting beta-2 agonist                            |
| LAMA             | Long-acting muscarinic antagonist                     |

1  
2 36  
3 37 **FUNDING**

4 38 Associates of Vectura licensed a formoterol/fluticasone inhaler to Mundipharma Pharmaceuticals.  
5 39 Mundipharma has since developed, registered, marketed and distributed this product and  
6 40 sponsored this study. This study was designed and completed prior to acquisition of Vectura by  
7 41 Philip Morris International.  
8 42

9 43 **CONFLICT OF INTEREST**

10 44 A. Sicras is an independent consultant funded by Mundipharma with respect to this manuscript. ST  
11 45 and TF are employees of Mundipharma. The other authors state they have no conflict of interest in  
12 46 relation to this study.  
13 47

14 48  
15 49 **AUTHOR CONTRIBUTIONS**

16 50 A. Sicras and T. Fernández conceived and designed the manuscript; data collection and the  
17 51 statistical analysis were made by A. Sicras; and the interpretation of the data, writing, review and  
18 52 approval of the manuscript submitted, by all authors.  
19 53

20 54  
21 55 **ETHICS APPROVAL**

22 56 His protocol was reviewed and approved at Foundation Redis (Ethical Research Committee;  
23 57 International University of Catalonia; code: ANT-PER-2017-01).  
24 58

25 59 **DATA AVAILABILITY**

26 60 The datasets generated during and/or analyzed during the current study are available from the  
27 61 corresponding author upon reasonable request.  
28 62

29 63 **PATIENT CONSENT FOR PUBLICATION.**

30 64 Not required.  
31 65  
32 66  
33 67  
34  
35  
36  
37  
38  
39  
40  
41  
42  
43  
44  
45  
46  
47  
48  
49  
50  
51  
52  
53  
54  
55  
56  
57  
58  
59  
60

68 **STROBE Statement—Checklist of items that should be included in reports of *observational studies*.**

69

|                              | Item No | Recommendation                                                                                                                                                                                               | Page No |
|------------------------------|---------|--------------------------------------------------------------------------------------------------------------------------------------------------------------------------------------------------------------|---------|
| <b>Title and abstract</b>    | 1       | (a) Indicate the study's design with a commonly used term in the title or the abstract                                                                                                                       | 5       |
|                              |         | (b) Provide in the abstract an informative and balanced summary of what was done and what was found                                                                                                          | 5       |
| <b>Introduction</b>          |         |                                                                                                                                                                                                              |         |
| Background/rationale         | 2       | Explain the scientific background and rationale for the investigation being reported                                                                                                                         | 6       |
| Objectives                   | 3       | State specific objectives, including any prespecified hypotheses                                                                                                                                             | 6       |
| <b>Methods</b>               |         |                                                                                                                                                                                                              |         |
| Study design                 | 4       | Present key elements of study design early in the paper                                                                                                                                                      | 6       |
| Setting                      | 5       | Describe the setting, locations, and relevant dates, including periods of recruitment, exposure, follow-up, and data collection                                                                              | 6-7     |
| Participants                 | 6       | (a) Give the eligibility criteria, and the sources and methods of selection of participants                                                                                                                  | 6-7     |
| Variables                    | 7       | Clearly define all outcomes, exposures, predictors, potential confounders, and effect modifiers. Give diagnostic criteria, if applicable                                                                     | 8       |
| Data sources/<br>measurement | 8*      | For each variable of interest, give sources of data and details of methods of assessment (measurement). Describe comparability of assessment methods if there is more than one group                         | 8       |
| Bias                         | 9       | Describe any efforts to address potential sources of bias                                                                                                                                                    | 8       |
| Study size                   | 10      | Explain how the study size was arrived at                                                                                                                                                                    | 8       |
| Quantitative variables       | 11      | Explain how quantitative variables were handled in the analyses. If applicable, describe which groupings were chosen and why                                                                                 | 8       |
| Statistical methods          | 12      | (a) Describe all statistical methods, including those used to control for confounding                                                                                                                        | 8       |
|                              |         | (b) Describe any methods used to examine subgroups and interactions                                                                                                                                          | 8       |
|                              |         | (c) Explain how missing data were addressed                                                                                                                                                                  | 8       |
|                              |         | (d) If applicable, describe analytical methods taking account of sampling strategy                                                                                                                           | NA      |
|                              |         | (e) Describe any sensitivity analyses                                                                                                                                                                        | NA      |
| <b>Results</b>               |         |                                                                                                                                                                                                              |         |
| Participants                 | 13*     | (a) Report numbers of individuals at each stage of study—eg numbers potentially eligible, examined for eligibility, confirmed eligible, included in the study, completing follow-up, and analysed            | 8       |
|                              |         | (b) Give reasons for non-participation at each stage                                                                                                                                                         | 8       |
|                              |         | (c) Consider use of a flow diagram                                                                                                                                                                           | NA      |
| Descriptive data             | 14*     | (a) Give characteristics of study participants (eg demographic, clinical, social) and information on exposures and potential confounders                                                                     | 8       |
|                              |         | (b) Indicate number of participants with missing data for each variable of interest                                                                                                                          | 8       |
| Outcome data                 | 15*     | Report numbers of outcome events or summary measures                                                                                                                                                         | 9       |
| Main results                 | 16      | (a) Give unadjusted estimates and, if applicable, confounder-adjusted estimates and their precision (eg, 95% confidence interval). Make clear which confounders were adjusted for and why they were included | 9       |
|                              |         | (b) Report category boundaries when continuous variables were categorized                                                                                                                                    | 9       |
|                              |         | (c) If relevant, consider translating estimates of relative risk into absolute risk for a meaningful time period                                                                                             | NA      |
| Other analyses               | 17      | Report other analyses done—eg analyses of subgroups and interactions, and sensitivity analyses                                                                                                               | NA      |

|                          |    |                                                                                                                                                                            |    |
|--------------------------|----|----------------------------------------------------------------------------------------------------------------------------------------------------------------------------|----|
| <b>Discussion</b>        |    |                                                                                                                                                                            |    |
| Key results              | 18 | Summarise key results with reference to study objectives                                                                                                                   | 9  |
| Limitations              | 19 | Discuss limitations of the study, taking into account sources of potential bias or imprecision. Discuss both direction and magnitude of any potential bias                 | 10 |
| Interpretation           | 20 | Give a cautious overall interpretation of results considering objectives, limitations, multiplicity of analyses, results from similar studies, and other relevant evidence | 10 |
| Generalisability         | 21 | Discuss the generalizability (external validity) of the study results                                                                                                      | 10 |
| <b>Other information</b> |    |                                                                                                                                                                            |    |
| Funding                  | 22 | Give the source of funding and the role of the funders for the present study and, if applicable, for the original study on which the present article is based              | 2  |

70  
71  
72

For peer review only

1  
2 73 **Treatment persistence and exacerbations in asthmatic patients initiating treatment with inhaled**  
3 74 **corticosteroids and long-acting beta2-adrenergic agonists: retrospective cohort study**  
4 75  
5 76

6  
7 77 **ABSTRACT**  
8 78

9  
10 79 **Objective.** To determine treatment persistence and exacerbations in patients initiating inhaler  
11 80 treatment with fixed-dose combinations of inhaled corticosteroids/long-acting beta2-adrenergic  
12 81 agonists (ICS/LABA) for the treatment of asthma.

13  
14 82 **Design.** Retrospective observational study conducted by review of electronic medical records  
15 83 (database: Fundacion RedISS).

16  
17 84 **Setting.** Retrospective cohort study. The follow-up period was one year.

18  
19 85 **Participants** The study included patients aged  $\geq 18$  years who started treatment with ICS/LABA  
20 86 and met the inclusion/exclusion criteria.

21  
22 87 **Main outcomes and measures.** The study groups were fluticasone propionate/salmeterol  
23 88 (FP/SAL), beclomethasone/formoterol (BDP/FORM), budesonide/formoterol (BUD/FORM),  
24 89 fluticasone furoate/vilanterol (FF/VI) and fluticasone propionate/formoterol (FP/FORM). The main  
25 90 measurements were persistence, medication possession ratio (MPR), and exacerbations.  
26 91 Statistical significance was established as  $p < 0.05$ .

27  
28 92 **Results.** In total, 3,203 patients were recruited for the study. By groups, 31.1% FP/SAL, 28.6%  
29 93 BDP/FORM, 25.0% BUD/FORM, 8.2% FF/VI, and 7.0% FP/FORM. The mean age was 52.2 years,  
30 94 60.8% were female, and 44.9% had persistent-moderate asthma. Treatment persistence was  
31 95 61.7% (95% CI: 60.0-63.4%) and by study groups it was: FP/SAL: 60.7%, BDP/FORM: 61.2%,  
32 96 BUD/FORM: 60.3%, FF/VI: 66.7% and FP/FORM: 67.6%, ( $p=0.046$ ). MPR by study group was  
33 97 FP/SAL: 74.3, BDP/FORM: 73.8%, BUD/FORM: 74.6%, FF/VI: 79.4% and FP/FORM: 80.6%  
34 98 ( $p=0.028$ ). The mortality rate was 2.9%. By treatment group, exacerbations were FP/SAL: 21.9%  
35 99 (95% CI: 19.3-24.5), BDP/FORM: 22.2% (95% CI: 19.5-24.9), BUD/FORM: 22.8% (95% CI: 19.9-  
36 100 25.7), FF/VI: 17.9% (95% CI: 14.9-20.7) and FP/FORM: 16.0% (95% CI: 12.2-19.3),  $p=0.036$ .

37  
38 101  
39 102 **Conclusions.** Patients undergoing treatment with FP/FORM and FF/VI vs. FP/SAL, BDP/FORM,  
40 103 BUD/FORM, were associated with greater treatment adherence (persistence, MPR) and lower rates  
41 104 of exacerbations. However, further studies will be needed to strengthen the consistency of the  
42 105 results.

43  
44 106  
45 107 **Keywords:** asthma, persistence, exacerbations, ICS/LABA.  
46 108  
47 109  
48  
49  
50  
51  
52  
53  
54  
55  
56  
57  
58  
59  
60

1  
2 110  
3 111 **ARTICLE SUMMARY**  
4 112  
5 113

6 114 **STRENGTHS AND LIMITATIONS OF THIS STUDY**

- 7 115  
8 116  
9 117  
10 118  
11 119  
12 120  
13 121  
14 122  
15 123  
16 124  
17 125
- Reducing the risk of exacerbations is an important goal in the treatment of asthma. However, in our country there are few studies that evaluate this by analyzing the effect of double inhalation therapy at the level of active ingredient (molecule).
  - The results of the study were obtained in a situation of routine clinical practice, far from the idyllic conditions of randomized clinical trials.
  - This study has the limitations of retrospective observational studies; for example, the possible underreporting of information, the difficulty in measuring the confounding variables and the impossibility of establishing a causal relationship between the variables.
- 18  
19  
20  
21  
22  
23  
24  
25  
26  
27  
28  
29  
30  
31  
32  
33  
34  
35  
36  
37  
38  
39  
40  
41  
42  
43  
44  
45  
46  
47  
48  
49  
50  
51  
52  
53  
54  
55  
56  
57  
58  
59  
60

For peer review only

## 126 INTRODUCTION

127 Asthma is a chronic inflammatory airway disease that courses with bronchial hyper-response and  
128 variable airflow blockage<sup>1</sup>. In Spain, the prevalence is around 5%, although there are variations  
129 between geographical areas<sup>2</sup>. Most patients achieve adequate control with inhaled corticosteroids  
130 (ICS) and long-lasting beta-adrenergic agonists (LABA), although some patients require additional  
131 therapy with other medications, including oral corticosteroids (OC)<sup>1-2</sup>.

132  
133 Reducing the risk of exacerbations is an important goal of asthma treatment<sup>3</sup>. It is estimated that  
134 30-52% of patients with asthma have exacerbations of varying intensity<sup>2,6</sup>. Factors influencing an  
135 increased risk of exacerbations include previous exacerbations, poor asthma control, limitations on  
136 activity, lower forced expiratory volume in the first second (FEV<sub>1</sub>), exposure to allergens, difficulty  
137 handling inhalation devices and treatment adherence<sup>7</sup>. Studies show anti-asthmatic adherence  
138 rates of <65%<sup>1-2,7</sup>. The most common cause of treatment discontinuation are side effects,  
139 improvements in symptoms and problems in reducing the effect of the drug over time, which lead  
140 to discontinuation being advised or spontaneous abandonment<sup>7-10</sup>.

141  
142 In Spain, there are few studies evaluating the relationship between the adherence rate and the risk  
143 of exacerbations<sup>11</sup>. Persistence (or discontinuation) of treatment is a key factor in disease  
144 progression and the risk of complications. In addition, there is a growing need to conduct studies  
145 representative of the real-life clinical conditions in which medicines are used, so the study may be  
146 of interest. The objective of the study was to evaluate treatment persistence and exacerbations in  
147 patients initiating inhaler treatment with combinations of ICS/LABA for the treatment of asthma in  
148 routine clinical practice.

## PATIENTS AND METHODS

*Patient and public involvement:* no patient involved.

We performed a retrospective observational analysis of electronic medical records (EMR) obtained from the administrative database of the RediSS Foundation (Health services research network; [www.rediss.es](http://www.rediss.es)), a source of secondary data. The primary data came from various primary care centers in Catalonia (Spain), which are computerized with the OMIAPWIN (EMR). Before export to RediSS Foundation, data are rigorously anonymized and it is not possible to identify the territory, health care provider, treating physician, or patient or access any other information that would permit individual identification. This procedure ensures adherence to current law governing the protection of personal data. The population assigned to the centers was mostly urban, of medium-low socioeconomic level.

Patients who sought care and initiated treatment with a fixed dose ICS/LABA combination between 01/01/2015 and 30/06/2016 (recruitment period, index date) were included in the study. The inclusion criteria were: (a)  $\geq 18$  years, (b) patients diagnosed with asthma  $\geq 12$  months before the index date, (c) inclusion in the prescription program (with recorded dose, time interval and duration of each treatment administered;  $\geq 2$  prescriptions during the follow-up period), and (d) ensured regular monitoring ( $\geq 2$  clinical records in the computer system). Exclusion criteria were: (a) patients transferred to other centers, displaced or out-of-area, (b) permanently institutionalized patients, (c) a history of COPD, pulmonary emphysema, bronchiectasis, cystic fibrosis or bronchial neoplasm, and (d) mixed asthma-COPD phenotype (asthma-COPD overlap)<sup>1</sup>.

Five study groups were differentiated according to the initial fixed-dose combination of ICS/LABA: Budesonide /formoterol (BUD/FORM, R03AK07), Beclomethasone /formoterol (BDP/FORM, R03AK08), Fluticasone furoate/vilanterol (FF/VI, R03AK10), Fluticasone propionate/formoterol (FP/FORM, R03AK11) and Fluticasone propionate/salmeterol (FP/SAL, R03AK06). The follow-up period, from the date of inclusion of the patient was one year. Records of asthma patients were obtained using the International Classification of Primary Care in the European Community (ICPC-2; R93)<sup>12</sup>, and/or the International Classification of Diseases (ninth edition) Clinical Modification (ICD-9-MC; 493.x for asthma and/or flare-ups). The diagnosis of asthma was always made at the physician's discretion, according to spirometry values. Exacerbations were defined as an event in the natural course of the disease characterized by acute episodes identified by a progressive increase in breathing difficulties, feeling short of breath, wheezing, chest oppression or a combination of these symptoms, caused by intense airflow obstruction<sup>1</sup>. Outpatients or those attending the emergency department (mild-moderate asthma exacerbation) and hospitalized patients (severe asthma exacerbation) were identified. The record of each exacerbation was obtained to assess the rates before and after the index date, and the time from diagnosis (in years).



1  
2 188 In addition, the following variables were collected: body mass index (BMI, kg/m<sup>2</sup>), lung function  
3 189 (forced expiratory volume in the first second, FEV<sub>1</sub>), asthma severity (intermittent, mild persistent,  
4 190 moderate persistent and severe persistent according to the GEMA criteria<sup>1</sup> at the start of the study  
5 191 before the index date. All-cause deaths were recorded.  
6  
7

8 192  
9  
10 193 Sociodemographic and comorbidity variables collected were age (continuous and by range), sex,  
11 194 and the personal history described in table 1. As a summary variable of general comorbidity: a) the  
12 195 Charlson<sup>13</sup> comorbidity index was used as an approximation to severity, b) the number of chronic  
13 196 comorbidities was obtained, and c) the individual case-mix index was obtained from the Adjusted  
14 197 Clinical Groups (ACG), which is a patient classification system using iso-consumption of  
15 198 resources<sup>14</sup>. The ACG application provides resource utilization bands (RUB), allowing each patient  
16 199 to be grouped into one of five mutually exclusive categories based on their overall morbidity.  
17  
18  
19  
20  
21

22 201 The medicines (active substances) indicated for treatment were obtained according to the  
23 202 Anatomical Therapeutic Chemical Classification System (ATC)<sup>15</sup> classification: oral/systemic  
24 203 corticosteroids (CO, H02AB), short-lasting beta-2 agonists (SABA, R03AC), systemic beta-2  
25 204 agonists (xanthines, R03\*), leukotriene receptor antagonists (R03DC), anticholinergics (LAMA,  
26 205 R03BB04: tiotropium bromide) and omalizumab (biologicals, R03DX05). In addition, patients  
27 206 receiving chronic doses of long-lasting oral/systemic corticosteroids were differentiated from those  
28 207 receiving them only for stabilization of an exacerbation. The choice of drug for a specific patient  
29 208 was at the discretion of the physician, as in routine clinical practice. The information was obtained  
30 209 from drug dispensing records. The scheduled dose of ICS administered was classified at low,  
31 210 medium or high<sup>1</sup>. Treatment persistence was calculated from the index date to the discontinuation  
32 211 date in months. The discontinuation date was the date on which the patient switched to another  
33 212 ICS/LABA or interrupted treatment for  $\geq 60$  days without renewing the medication and/or had  $\geq 2$   
34 213 prescriptions dispensed. The rate of treatment persistence was obtained at 6 and 12 months of  
35 214 follow-up. The percentage of therapeutic compliance was calculated based on the medicine  
36 215 possession ratio (MPR)<sup>16</sup>. This was evaluated from the first to the last prescription and represented  
37 216 the number of days of medication dispensed according to the number of days on treatment from  
38 217 the index date.  
39  
40  
41  
42  
43  
44  
45  
46  
47  
48  
49

50 218  
51 219 Records were validated to ensure the quality of the results. A descriptive-univariate statistical  
52 220 analysis was carried out. Qualitative data were described using absolute and relative frequencies  
53 221 and quantitative data as means and standard deviation (SD). The 95% confidence intervals (CI)  
54 222 used to estimate parameters were based on the total number of subjects with no missing values.  
55 223 The normality of the distribution was assessed using the Kolmogorov-Smirnov test. In the bivariate  
56 224 analysis, ANOVA, the Chi squared test and comparison of means were used for paired data. A  
57 225 multiple linear regression model was used to obtain the variables associated with the number of  
58  
59  
60

1  
2 226 exacerbations (dependent variables; procedure: consecutive steps). The covariates included in the  
3 227 model were: sex, age, general comorbidity (RUB), FEV<sub>1</sub>, disease duration and asthma severity.  
4  
5 228 Persistence was assessed using Kaplan-Meier curves (Log rank procedure; Mantel-Cox). The  
6 229 analysis was made using SPSSWIN version 23. Statistical significance was established as p<0.05.

7  
8 230  
9 231 *Ethics Approval: His protocol was reviewed and approved at Foundation RediSS (Ethical Research*  
10 232 *Committee; International University of Catalonia; code: ANT-PER-2017-01).*

11 233  
12  
13 234

14  
15  
16  
17  
18  
19  
20  
21  
22  
23  
24  
25  
26  
27  
28  
29  
30  
31  
32  
33  
34  
35  
36  
37  
38  
39  
40  
41  
42  
43  
44  
45  
46  
47  
48  
49  
50  
51  
52  
53  
54  
55  
56  
57  
58  
59  
60

For peer review only

## RESULTS

Of an initial population of 8,725 subjects diagnosed with asthma (prevalence: 5.4%; 95% CI: 5.2-5.7%), 3,203 patients who met the inclusion/exclusion criteria and could be followed during the study period were analysed. Table 1 shows the baseline characteristics of participants according to the five ICS/LABA study groups. The mean age was 52.2 years, 60.8% were women, the mean RUB was 2.9 points, and the mean Charlson index was 0.7 points. Allergic rhinitis (62.3%), dyslipidemia (41%), gastroesophageal reflux (39.6%) and high blood pressure (28.4%) were the most frequent comorbidities: 44.9% of patients had persistent-moderate asthma, with a mean FEV<sub>1</sub> of 74.6%. According to the initial ICS/LABA prescribed, the study groups were as follows: 31.1% (N=996) FP/SAL, 28.6% (N=917) BDP/FORM, 25% (N=802) BUD/FORM, 8.2% (N=263) FF/VI and 7.0% (N=225) FP/FORM. There was acceptable comparability in the baseline characteristics of the study groups.

Medication administered and treatment adherence (persistence and MPR) during the follow-up period according to the study groups are detailed in table 2: 95.7% of patients were receiving short-term beta-2 agonists (SABA) as rescue treatment, 27.7% were receiving oral corticosteroids (20% for regular/chronic use) and 18.2% leukotriene antagonists. There was acceptable homogeneity between the groups. Treatment persistence at 12 months was 61.7% (95% CI: 60-63.4%) and, by study group, was as follows: FP/SAL: 60.7%, BDP/FORM: 61.2%, BUD/FORM: 60.3%, FF/VI: 66.7% and FP/FORM: 67.6% (p=0.046). The MPR was FP/SAL: 74.3%, BDP/FORM: 73.8%, BUD/FORM: 74.6%, FF/VI: 79.4% and FP/FORM: 80.6% (p=0.028). The mortality rate was 2.9%.

Exacerbations by study group are described in table 3. Overall, 21.5% of patients had some form of exacerbation, and the rates were slightly lower in groups treated with FP/FORM and FF/VI. The percentages of patients with exacerbations according to study group were FP/SAL: 21.9% (95% CI: 19.3-24.5), BDP/FORM: 22.2% (95% CI: 19.5-24.9), BUD/FORM: 22.8% (95% CI: 19.9-25.7), FF/VI: 17.9% (95% CI: 14.9-20.7) and FP/FORM: 16.0% (95% CI: 12.2-19.3), p=0.036. The differences were most evident in patients with severe exacerbations (7.9%, 6.0%, 7.9%, 6.8% and 4.0%, respectively (p<0.001)). The reductions in exacerbations from baseline to 12 months were: FP/SAL: -6.8%, BDP/FORM: -5.9%, BUD/FORM: -6.1%, FF/VI: -8.6% and FP/FORM: -9.3%, respectively (p=0.037). In the multivariate model, the number of exacerbations during the follow-up was associated with previous exacerbations ( $\beta$ -0.798), FEV<sub>1</sub> ( $\beta$ -0.075) and persistence ( $\beta$ -0.011) (p<0.033). The model determination coefficient was 85.1%. Figure 1 details the percentage of exacerbations according to asthma severity and figure 2 shows the median treatment persistence during the follow-up period.

**DISCUSSION**

The results of the study show that patients initiating fixed-dose treatment with FP/FORM and FF/VI were associated with increased persistence and MPR, resulting in fewer exacerbations compared with other ICS/LABA. Only patients receiving FP/FORM were associated with a lower rate of severe asthma exacerbations. FP/FORM and FF/VI, which are newer combinations, were less often prescribed (7% and 8.2%, respectively).

ICS /LABA are the basis of persistent asthma treatment, although the literature reviewed shows a low rate of adherence to medication (<65% per year)<sup>11,16-17</sup>. A review of 19 studies shows treatment adherence ranged between 22% and 63% and that 24% of exacerbations and 60% of asthma-related hospitalizations were attributable to poor adherence<sup>18</sup>. Zhang<sup>19</sup> found a persistence of 33.6% in children with persistent asthma on monotherapy. Our results are similar or perhaps slightly higher than those reported but are still low. There may be several possible explanations: a) the method of measuring persistence/MPR, b) the dose indicated at the beginning of the study, c) ours is a more recent study, d) the patients who sought care assiduously attended check-ups, and/or e) are subject to specific nursing follow-up. In addition, in the studies reviewed, therapeutic non-compliance was associated with young patients with mild asthma, while fixed combinations improve adherence, as confirmed by our results<sup>18,20</sup>.

Our results show that 21.5% of patients had some form of exacerbation, and that the rate was slightly lower in patients treated with FP/FORM and FF/VI. The risk of exacerbations was associated with clinical severity (FEV<sub>1</sub>), previous exacerbations, limitations on activity, allergic rhinitis, insufficient preventive anti-inflammatory treatment and/or poor compliance with the prescribed treatment<sup>20</sup>. Schmidt<sup>21</sup>, in a year-long prospective observational, found that treatment with FP/FORM was associated with clinical improvements in asthma (degree of control, severe exacerbation, quality of life and lung function). Usmani<sup>22</sup> studied patients with controlled asthma and found that a reduction in the dose of FP/FORM did not affect exacerbations and was well tolerated. A comparative review of the rate of severe asthma exacerbations observed in clinical trials of different fixed-dose combinations of ICS/LABA by Papi<sup>20</sup> found that the incidence of exacerbations with FP/FORM was lower than that for other combinations of ICS/LABA (especially those that result in hospitalization) and that the difference cannot be explained solely by the characteristics of the studies (design, population, etc.) and could be related to the pharmacological (molecular) characteristics of the combination. A clinical trial of FF/VI also found a lower rate of asthma exacerbations, although it was similar to FP/SAL<sup>23</sup>. Another recent trial found that FF/VI showed better asthma control than habitual optimized treatment, but that there were no differences in the rate of asthma exacerbations<sup>24</sup>. With design limitations, our data is in line with the literature consulted<sup>20,25</sup>. However, the different definitions of asthma exacerbation make comparisons difficult;

1  
2 308 in our study the definition of exacerbation was at the clinician's discretion and was based on the  
3 309 use of health resources.  
4

5 310  
6 311 The study has some limitations. Principally those typical of retrospective studies (underreporting /  
7 312 absence of information). In this sense, the categorization of the disease (asthma) and the possible  
8 313 classification bias of patients, including the possible inaccuracy of diagnostic coding about the  
9 314 diagnosis of asthma and other comorbidities, are some examples, attributable to the information  
10 315 system. To reduce this bias, a validation of the variables was carried out before analysis. The  
11 316 definition of exacerbation was analyzed based on the use of resources (administered drugs,  
12 317 hospital admissions) in the absence of a specific coding system. However, it is a consensus criterion  
13 318 in retrospective studies and should affect all the cohorts analyzed in a similar way. In addition, other  
14 319 unmeasured factors could have influenced the results, for example, the socioeconomic level of  
15 320 patients, environmental/work exposure, evolution of the prescribed pharmacological dose,  
16 321 verification of the inhalation technique, including bronchoconstrictor therapy and/or the  
17 322 differentiation of phenotypes. In addition, based on the demand for medical care, non-disease  
18 323 factors may have influenced the results, such as access to health resources, comorbidity or patient  
19 324 specifics, which could cause worsening episodes not to be reported by the patient and therefore  
20 325 remain untreated. It is possible that through a prospective study, some of these factors can be  
21 326 minimized. The capturing patient behavior through treatment persistence cannot be directly  
22 327 assessed through structured data available in electronic databases. Time to discontinuation is  
23 328 assumed to be a proxy to estimate patient persistence. In addition, the external validity of the results  
24 329 with respect to the representativeness of the population and the small number of patients per study  
25 330 group should also be considered as limitations. When using an efficient inhaler therapy<sup>24-25</sup>, the  
26 331 factors that most influence compliance include the type of device, the technique used, and the  
27 332 health-education instructions received. However, these limitations should affect all the analyzed  
28 333 cohorts in a similar way and should not affect the external validity of the results.  
29  
30  
31  
32  
33  
34  
35  
36  
37  
38  
39  
40  
41  
42  
43

44 335 The future perspectives offered by this study are those of its replication in other health institutions  
45 336 and interventional strategies aimed at promoting patient self-care (structured and individualized  
46 337 educational programs). In conclusion, patients receiving FP/FORM and FF/VI were associated with  
47 338 increased treatment adherence (persistence, MPR) and lower rates of exacerbations. However,  
48 339 further studies will be needed to strengthen the consistency of the results.  
49  
50  
51  
52  
53  
54  
55  
56  
57  
58  
59  
60

1  
2 342 **REFERENCES**

- 3 343 1. Spanish guide to asthma management (GEMA<sup>4,3</sup>). Version 2018. Available at: <https://www.gemasma.com>. Accessed: January 2021.
- 4 344  
5 345
- 6 346 2. Vila-Rigat R, Panads Valls R, Hernandez Huet E, et al. Prevalence of Work-Related Asthma and its  
7 347 Impact in Primary Health Care. *Arch Bronconeumol*. 2015;51:449-55.
- 8 348
- 9 349 3. JR Castle, Peters SP, Busse WW. Asthma Exacerbations: Pathogenesis, Prevention, and Treatment.  
10 350 *J Allergy Clin Immunol Pract*. 2017;5:918-27.
- 11 351
- 12 352 4. Stenson EK, Tchou MJ, Wheeler DS. Management of acute asthma exacerbations. *Curr Opin Pediatr*.  
13 353 2017;29:305-10.
- 14 354
- 15 355 5. Quirce S, Delgado J, Entrenas LM, et al.; ASMAFORUM II Group. Quality Indicators of Asthma Care  
16 356 Derived From the Spanish Guidelines for Asthma Management (GEMA 4.0): A Multidisciplinary Team  
17 357 Report. *J Investig Allergol Clin Immunol*. 2017;27:69-73.
- 18 358
- 19 359 6. FitzGerald JM, Barnes PJ, Chipps BE, Jenkins CR, O'Byrne PM, Pavord ID, Reddel HK. The burden  
20 360 of exacerbations in mild asthma: a systematic review. *ERJ Open Res*. 2020;6(3):00359-2019.
- 21 361
- 22 362 7. Darba J, Ramírez G, Sicras A, García-Bujalance L, Torvinen S, Sánchez-de la Rosa R. Identification  
23 363 of factors involved in medication compliance: incorrect inhaler technique of asthma treatment leads to  
24 364 poor compliance. *Patient Prefer Adherence*. 2016;10:135-45.
- 25 365
- 26 366 8. Sicras-Mainar A, Huerta A, Sánchez D, Navarro-Artieda R. Use of resources and costs associated  
27 367 with non-adherence to inhaled corticosteroid treatment in asthma. *Semergen*. 2018;44:13-22.
- 28 368
- 29 369 9. Vasbinder EC, Belitser SV, Souverein PC, van Dijk L, Vulto AG, van den Bemt PM. Non-adherence  
30 370 to inhaled corticosteroids and the risk of asthma exacerbations in children. *Patient Prefer Adherence*.  
31 371 2016; 10:531-8.
- 32 372
- 33 373 10. Dima AL, Hernandez G, Cunillera O, Ferrer M, de Bruin M; ASTRO-LAB group. Asthma inhaler  
34 374 adherence determinants in adults: systematic review of observational data. *Eur Respir J*. 2015;45:994-  
35 375 1018.
- 36 376
- 37 377 11. Sicras-Mainar A, Traseira-Lugilde S, Fernández-Sánchez T, Navarro-Artieda R. Treatment  
38 378 persistence and resources use with inhaled fixed-dose combinations of corticosteroids and long-acting  
39 379  $\beta$ -adrenergic agonists for the treatment of asthma: A population-based retrospective study. *Semergen*.  
40 380 2018;44(7):472-484.
- 41 381
- 42 382 12. Lamberts H, Wood M, Hofmans-Okkes AM (eds). The International Classification of Primary Care in  
43 383 the European Community. With a multi-language layer. Oxford: Oxford University Press, 1993.
- 44 384
- 45 385 13. Charlson ME, Pompei P, Ales KL, Mackenzie CR. A new method of classifying prognostic  
46 386 comorbidity in longitudinal studies: development and validation. *J Chronic Dis*. 1987;40:373-383.
- 47 387
- 48 388 14. Sicras-Mainar A, Navarro-Artieda R. Adjusted clinical groups: a patient classification system through  
49 389 risk adjustment. *Rev Med Exp Public Health*. 2013;30:308-14. Peru
- 50 390
- 51 391 15. The Anatomical Therapeutic Chemical Classification System with Defined Daily Doses (ATC/DDD):  
52 392 World Health Organization. Available at: <http://www.who.int/classifications/atcddd/en/>. Accessed:  
53 393 10/04/2020.
- 54 394
- 55 395 16. Mattke S, Martorell F, Hong SY, Sharma P, Cuellar A, Lurie N. Anti-inflammatory medication  
56 396 adherence and cost and utilization of asthma care in a commercially insured population. *J Asthma*.  
57 397 2010;47:323-9.
- 58 398
- 59 399
- 60

- 1  
2 399 17. Voshaar T, Kostev K, Rex J, Schroder-Bernhardi D, Maus J, Munzel U. A retrospective database  
3 400 analysis on persistence with inhaled corticosteroid therapy: comparison of two dry powder inhalers  
4 401 during asthma treatment in Germany. *Int J Clin Pharmacol Ther.* 2012;50:257-64.  
5 402
- 6 403 18. Bårnes CB, Ulrik CS. Asthma and Adherence to Inhaled Corticosteroids: Current Status and Future  
7 404 Perspectives. *Respiratory Care.* 2015;60(3):455-68.  
8 405
- 9 406 19. Zhang Q, Taylor SD, Sazonov V, Thomas M, Price D. Suboptimal persistence with inhaled  
10 407 corticosteroid monotherapy among children with persistent asthma in the in the UK. *Prim Care Respir J.*  
11 408 2011;20:97-101.  
12 409
- 13 410 20. Daddy A, Mansur AH, Pertseva T, Kaiser K, McIver T, Grothe B, Dissanayake S. Long-Term  
14 411 Fluticasone Propionate/Formoterol Fumarate Combination Therapy Is Associated with a Low Incidence  
15 412 of Severe Asthma Exacerbations. *J Aerosol Med Lung Drug Deliv.* 2016;29:346-61.  
16 413
- 17 414 21. Schmidt O, Petro W, Hoheisel G, Kannies F, Oepen P, Langer-Brauburger B. Real-life effectiveness  
18 415 of asthma treatment with a fixed-dose fluticasone/formoterol pressurised metered-dose inhaler - Results  
19 416 from a non-interventional study. *Respir Med.* 2017;131:166-174.  
20 417
- 21 418 22. Usmani OS, Kempainen A, Gardener E, et al. A Randomized Pragmatic Trial of Changing and  
22 419 Stepping Down Fluticasone/Formoterol in Asthma. *J Allergy Clin Immunol Pract.* 2017;5:1378-87.  
23 420
- 24 421 23. Woodcock A, Bleecker ER, Lotvall J, et al. Efficacy and safety of fluticasone furoate/vilanterol  
25 422 compared with fluticasone propionate/salmeterol combination in adult and adolescent patients with  
26 423 persistent asthma: a randomized trial. *Chest.* 2013;144:1222-9.  
27 424
- 28 425 24. Woodcock A, Vestbo J, Bakerly ND, et al.; Salford Lung Study Investigators. Effectiveness of  
29 426 fluticasone furoate plus vilanterol on asthma control in clinical practice: an open-label, parallel group,  
30 427 randomised controlled trial. *Lancet.* 2017;390:2247-55.  
31 428
- 32 429 25. Shower FM, Ni Chroinin M, Greenstone I, Lasserson TJ. Addition of long-acting beta2-agonists to  
33 430 inhaled steroids versus higher dose inhaled steroids in adults and children with persistent asthma.  
34 431 *Cochrane Database Syst Rev.* 2010;(4):CD005533.  
35 432
- 36 433 26. Lewis A, Torvinen S, Dekhuijzen PNR, Chrystyn H, Watson AT, Blackney M, Plich A. The economic  
37 434 burden of asthma and chronic obstructive pulmonary disease and the impact of poor inhalation  
38 435 technique with commonly prescribed dry powder inhalers in three European countries. *BMC Health  
39 436 Services Research.* 2016;16:251.  
40 437
- 41 438 27. Normansell R, Kew KM, Stovold E. Interventions to improve adherence to inhaled steroids for  
42 439 asthma. *Cochrane Database Syst Rev.* 2017;4:CD012226.  
43 440  
44  
45  
46  
47  
48  
49  
50  
51  
52  
53  
54  
55  
56  
57  
58  
59  
60

Table 1. Baseline characteristics of the series studied by study groups

| Study groups                     | FP/SAL        | BDP/FORM      | BUD/FORM      | FF/VI        | FP/FORM     | p     |
|----------------------------------|---------------|---------------|---------------|--------------|-------------|-------|
| Number of patients, %            | N=996 (31.1%) | N=917 (28.6%) | N=802 (25.0%) | N=263 (8.2%) | N=225 (7%)  |       |
| <i>Sociodemographic features</i> |               |               |               |              |             |       |
| Mean age, years                  | 52.3 (19.3)   | 53.0 (18.5)   | 51.0 (16.8)   | 52.5 (17.7)  | 52.8 (17.1) | 0.245 |
| Sex (female)                     | 60.0%         | 61.1%         | 61.6%         | 61.6%        | 60.4%       | 0.968 |
| <i>General comorbidity</i>       |               |               |               |              |             |       |
| Mean diagnoses                   | 6.8 (3.9)     | 6.4 (3.9)     | 6.2 (3.6)     | 6.3 (3.6)    | 6.8 (3.8)   | 0.075 |
| Charlson index                   | 0.8 (0.8)     | 0.7 (0.8)     | 0.7 (0.6)     | 0.7 (0.8)    | 0.8 (0.9)   | 0.097 |
| Mean RUB                         | 3.0 (0.7)     | 2.9 (0.7)     | 2.9 (0.8)     | 3.0 (0.8)    | 2.9 (0.7)   | 0.198 |
| 1 (very low comorbidity)         | 4.1%          | 3.6%          | 8.2%          | 6.1%         | 4.9%        |       |
| 2 (low comorbidity)              | 10.3%         | 20.4%         | 12.5%         | 13.3%        | 12.0%       |       |
| 3 (moderate comorbidity)         | 71.1%         | 65.5%         | 63.1%         | 56.7%        | 67.6%       |       |
| 4 (high comorbidity)             | 14.0%         | 9.9%          | 15.8%         | 23.6%        | 14.7%       |       |
| 5 (very high comorbidity)        | 0.5%          | 0.5%          | 0.4%          | 0.4%         | 0.9%        | 0.111 |
| <i>Associated comorbidity</i>    |               |               |               |              |             |       |
| High blood pressure              | 29.9%         | 28.9%         | 29.1%         | 29.3%        | 29.3%       | 0.991 |
| Diabetes mellitus                | 13.4%         | 12.8%         | 13.0%         | 13.3%        | 12.9%       | 0.996 |
| Dyslipidemia                     | 41.0%         | 41.3%         | 41.3%         | 40.7%        | 39.8%       | 0.811 |
| Obesity                          | 27.9%         | 28.6%         | 27.7%         | 26.2%        | 27.6%       | 0.963 |
| Ischemic heart disease           | 4.3%          | 4.0%          | 4.0%          | 3.8%         | 4.0%        | 0.994 |
| Cerebrovascular accident         | 7.3%          | 7.0%          | 7.0%          | 6.8%         | 6.7%        | 0.995 |
| Cardiovascular event             | 11.8%         | 9.2%          | 9.1%          | 10.6%        | 10.2%       | 0.272 |
| Depressive syndrome              | 19.5%         | 19.6%         | 20.2%         | 20.9%        | 20.4%       | 0.982 |
| Malignancies                     | 10.9%         | 10.5%         | 10.3%         | 11.8%        | 10.2%       | 0.964 |
| Allergic rhinitis                | 61.7%         | 63.1%         | 61.8%         | 63.5%        | 62.2%       | 0.959 |
| Nasal polyposis                  | 15.5%         | 15.4%         | 15.3%         | 14.1%        | 16.4%       | 0.969 |
| Gastroduodenal reflux            | 39.1%         | 40.9%         | 38.0%         | 41.1%        | 40.9%       | 0.739 |
| <i>Asthma severity</i>           |               |               |               |              |             |       |
| Intermittent                     | 13.0%         | 14.9%         | 12.0%         | 12.5%        | 12.0%       |       |
| Mild persistent                  | 25.0%         | 21.5%         | 24.6%         | 25.1%        | 25.3%       |       |
| Moderate persistent              | 44.5%         | 45.1%         | 45.3%         | 43.3%        | 45.4%       |       |
| Severe/severe persistent         | 17.6%         | 18.4%         | 18.2%         | 19.0%        | 18.2%       | 0.844 |
| <i>Other variables</i>           |               |               |               |              |             |       |
| BMI, kg/m <sup>2</sup>           | 28.4 (5)      | 28.6 (5.0)    | 28.4 (5.0)    | 28.6 (5.5)   | 27.9 (4.9)  | 0.228 |
| FEV <sub>1</sub> (% theoretical) | 74.8%         | 74.3%         | 74.7%         | 74.6%        | 74.8%       | 0.954 |

Values expressed as percentage or mean (standard deviation), p: statistical significance. RUB: Resource utilization bands.

BMI: Body mass index, kg/m<sup>2</sup>, FEV<sub>1</sub>: Forced expiratory volume in the first second.

Groups: Fluticasone propionate/salmeterol (FP/SAL), Beclomethasone /formoterol (BDP/FORM), Budesonide/formoterol (BUD/FORM), Fluticasone furoate/vilanterol (FF/VI) and Fluticasone propionate /formoterol (FP/FORM).



Table 2. Medication administered and treatment persistence during the follow-up period

| Study groups                         | FP/SAL        | BDP/FORM      | BUD/FORM    | FF/VI        | FP/FORM      | p     |
|--------------------------------------|---------------|---------------|-------------|--------------|--------------|-------|
| Number of patients, %                | N=996 (31.1%) | N=917 (28.6%) | N=802 (25%) | N=263 (8.2%) | N=225 (7.0%) |       |
| <i>Medication use</i>                |               |               |             |              |              |       |
| Oral corticosteroids                 | 24.6%         | 22.8%         | 26.7%       | 25.5%        | 24.9%        | 0.465 |
| Oral corticosteroids for chronic use | 22.0%         | 18.5%         | 20.2%       | 18.6%        | 18.7%        | 0.373 |
| Systemic antibiotics                 | 10.0%         | 9.2%          | 10.1%       | 10.3%        | 10.1%        | 0.959 |
| Short-lasting beta-2 agonists        | 90.0%         | 93.0%         | 91.2%       | 89.5%        | 92.2%        | 0.221 |
| Long-lasting anticholinergics        | 17.0%         | 15.2%         | 13.8%       | 16.0%        | 13.8%        | 0.414 |
| Systemic beta-2 agonists (xanthines) | 3.8%          | 3.5%          | 3.2%        | 5.7%         | 3.1%         | 0.431 |
| Leukotriene receptor antagonists     | 17.7%         | 17.4%         | 19.5%       | 17.5%        | 19.6%        | 0.782 |
| Biologicals: omalizumab              | 1.3%          | 1.4%          | 1.2%        | 1.5%         | 1.3%         | 0.997 |
| <i>Inhaled corticosteroid doses</i>  |               |               |             |              |              |       |
| Low                                  | 10.5%         | 9.8%          | 10.1%       | 11.1%        | 10.7%        |       |
| Average                              | 47.1%         | 46.5%         | 45.0%       | 46.2%        | 47.1%        |       |
| High                                 | 42.4%         | 43.7%         | 44.9%       | 42.7%        | 42.2%        | 0.547 |
| <i>Other variables</i>               |               |               |             |              |              |       |
| Time from diagnosis, years           | 12.5 (4.5)    | 12.7 (4.4)    | 12.8 (4.2)  | 12.6 (3.9)   | 12.3 (3.9)   | 0.373 |
| Treatment possession, months         | 8.9 (3.6)     | 8.9 (3.4)     | 9.0 (3.3)   | 9.6 (3.3)*   | 9.7 (3.1)*   | 0.046 |
| Duration of treatment, months        | 9.9 (3.5)     | 9.7 (3.6)     | 10.0 (3.5)  | 10.2 (3.4)*  | 10.3 (3.2)*  | 0.036 |
| Medication possession rate           | 74.3%         | 73.8%         | 74.6%       | 79.4%*       | 80.6%*       | 0.028 |
| 95% CI                               | 71.6-77.0%    | 70.5-76.3%    | 71.6-77.6%  | 74.5-84.3%   | 75.4-85.8%   |       |
| <i>Treatment persistence, months</i> |               |               |             |              |              |       |
| 6 months                             | 81.9%         | 81.2%         | 82.4%       | 86.0%*       | 87.6%*       | 0.014 |
| 12 months                            | 60.7%         | 61.2%         | 60.3%       | 66.7%*       | 67.6%*       | 0.046 |
| Death                                | 3.0%          | 2.7%          | 3.1%        | 2.3%         | 2.7%         | 0.954 |

Values expressed as percentage or mean (SD: standard deviation), p: statistical significance. CI: Confidence intervals.

Groups: Fluticasone propionate /salmeterol (FP/SAL), Beclomethasone/formoterol (BDP/FORM), Budesonide/formoterol (BUD/FORM), Fluticasone furoate/vilanterol (FF/VI) and Fluticasone propionate/formoterol (FP/FORM). \*: Statistically significant results (observed > expected).

Table 3. Exacerbations by study groups

| Study groups                               | FP/SAL        | BDP/FORM      | BUD/FORM    | FF/VI        | FP/FORM    | pd     |
|--------------------------------------------|---------------|---------------|-------------|--------------|------------|--------|
| Number of patients, %                      | N=996 (31.1%) | N=917 (28.6%) | N=802 (25%) | N=263 (8.2%) | N=225 (7%) |        |
| <b>Follow-up period (one year)</b>         |               |               |             |              |            |        |
| Exacerbations, %                           | 21.9%         | 22.2%         | 22.8%       | 17.9%*       | 16.0%*     | 0.036  |
| Mean exacerbations                         | 0.4 (0.8)     | 0.4 (0.8)     | 0.4 (0.8)   | 0.3 (0.8)    | 0.3 (0.8)  | 0.087  |
| Number of exacerbations/year               |               |               |             |              |            |        |
| 0                                          | 78.1%         | 78.3%         | 77.2%       | 82.1%        | 84.0%      |        |
| 1                                          | 15.0%         | 14.9%         | 13.8%       | 9.9%         | 7.1%       |        |
| 2                                          | 2.9%          | 2.6%          | 5.5%        | 1.9%         | 5.3%       |        |
| 3+                                         | 4.0%          | 4.1%          | 3.5%        | 6.1%         | 3.6%       | <0.001 |
| <b>Patients with exacerbations</b>         |               |               |             |              |            |        |
| Mild-Moderate                              | 20.1%         | 21.7%         | 22.2%       | 17.5%*       | 16.0%*     | <0.001 |
| Severe (hospital admission)                | 7.9%          | 6.0%          | 7.9%        | 6.8%         | 4.0%*      | <0.001 |
| <b>Previous year (pre-index)</b>           |               |               |             |              |            |        |
| Exacerbations, %                           | 28.7%         | 28.1%         | 28.9%       | 25.5%        | 25.3%      | 0.698  |
| Mean exacerbations                         | 0.5 (0.9)     | 0.5 (0.9)     | 0.5 (0.9)   | 0.5 (1.0)    | 0.4 (0.9)  | 0.973  |
| Number of exacerbations/year               |               |               |             |              |            |        |
| 0                                          | 71.3%         | 71.9%         | 71.1%       | 74.5%        | 74.7%      |        |
| 1                                          | 17.1%         | 15.3%         | 15.1%       | 14.1%        | 15.6%      |        |
| 2                                          | 5.9%          | 8.4%          | 9.1%        | 3.0%         | 2.7%       |        |
| 3+                                         | 5.7%          | 4.5%          | 4.7%        | 8.4%         | 7.1%       | <0.001 |
| <b>Patients with exacerbations</b>         |               |               |             |              |            |        |
| Mild-Moderate                              | 27.5%         | 27.4%         | 28.7%       | 24.1%        | 25.4%      | 0.111  |
| Severe (hospital admission)                | 11.7%         | 10.8%         | 12.2%       | 10.6%        | 10.7%      | 0.217  |
| <b>Differences between the two periods</b> |               |               |             |              |            |        |
| Exacerbations, %                           | -6.8%         | -5.9%         | -6.1%       | -8.6%*       | -9.3%*     | 0.037  |
| Mild-Moderate                              | -7.4%         | -5.7%         | -6.5%       | -7.6%        | -8.4%      | 0.282  |
| Severe (hospital admission)                | -3.8%         | -4.8%         | -4.4%       | -5.8%*       | -6.7%*     | 0.044  |

Values expressed as percentage or mean (SD: standard deviation), p: statistical significance.

Groups: Fluticasone propionate /salmeterol (FP/SAL), Beclomethasone/formoterol (BDP/FORM), Budesonide/formoterol (BUD/FORM), Fluticasone furoate/vilanterol (FF/VI) and Fluticasone propionate/formoterol (FP/FORM). \*: Statistically significant results (effects observed > expected).

Figure 1. Percentage of patients with exacerbations according to their severity

Values expressed as a percentage of patients with exacerbations during the follow-up year.  
In grey, statistically significant results ( $p < 0.05$ ).

Groups: Fluticasone propionate /salmeterol (FP/SAL), Beclomethasone/formoterol (BDP/FORM),  
Budesonide/formoterol (BUD/FORM), Fluticasone furoate/vilanterol (FF/VI) and Fluticasone  
propionate/formoterol (FP/FORM).

For peer review only

1  
2  
3  
4  
5  
6  
7  
8  
9  
10  
11  
12  
13  
14  
15  
16  
17  
18  
19  
20  
21  
22  
23  
24  
25  
26  
27  
28  
29  
30  
31  
32  
33  
34  
35  
36  
37  
38  
39  
40  
41  
42  
43  
44  
45  
46  
47  
48  
49  
50  
51  
52  
53  
54  
55  
56  
57  
58  
59  
60

Figure 2. Median treatment persistence during the follow-up period

Kaplan-Meier Curve: Log Rank Procedure (Mantel-Cox): Chi-square-9,643; p-0.039.  
Groups: Fluticasone propionate /salmeterol (FP/SAL), Beclomethasone/formoterol (BDP/FORM), Budesonide/formoterol (BUD/FORM), Fluticasone furoate/vilanterol (FF/VI) and Fluticasone propionate /formoterol (FP/FORM).

For peer review only

1  
2  
3  
4  
5  
6  
7  
8  
9  
10  
11  
12  
13  
14  
15  
16  
17  
18  
19  
20  
21  
22  
23  
24  
25  
26  
27  
28  
29  
30  
31  
32  
33  
34  
35  
36  
37  
38  
39  
40  
41  
42  
43  
44  
45  
46  
47  
48  
49  
50  
51  
52  
53  
54  
55  
56  
57  
58  
59  
60

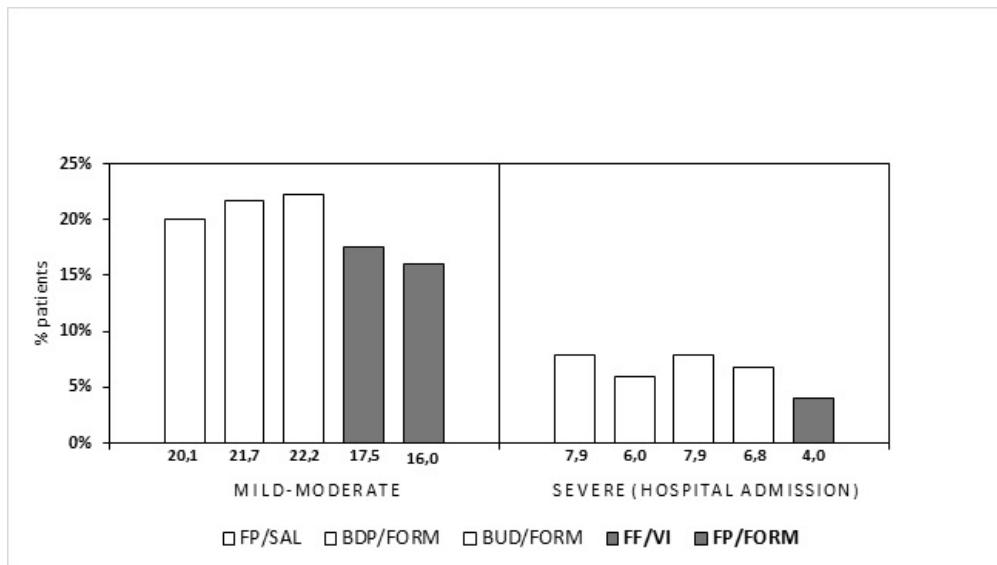

171x97mm (96 x 96 DPI)

1  
2  
3  
4  
5  
6  
7  
8  
9  
10  
11  
12  
13  
14  
15  
16  
17  
18  
19  
20  
21  
22  
23  
24  
25  
26  
27  
28  
29  
30  
31  
32  
33  
34  
35  
36  
37  
38  
39  
40  
41  
42  
43  
44  
45  
46  
47  
48  
49  
50  
51  
52  
53  
54  
55  
56  
57  
58  
59  
60

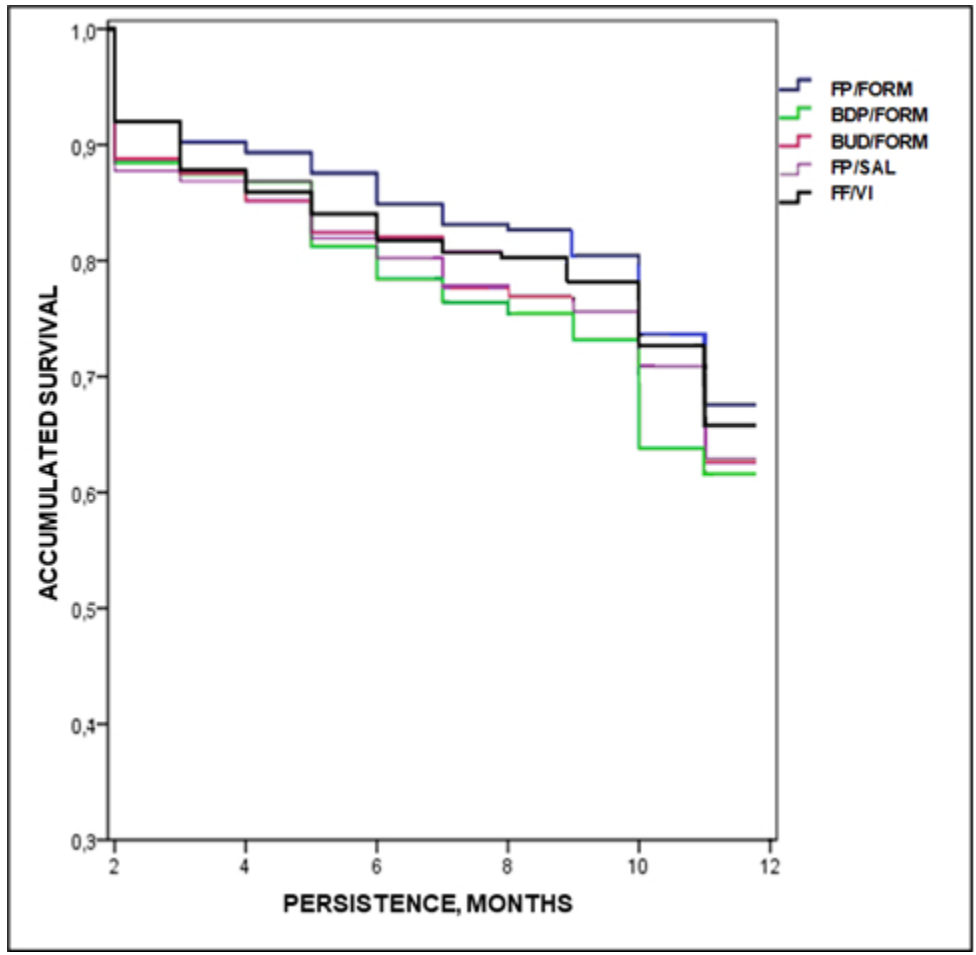

325x316mm (38 x 38 DPI)

# BMJ Open

## Treatment persistence and exacerbations in asthmatic patients initiating treatment with inhaled corticosteroids and beta-adrenergic agonists: retrospective cohort study

|                                 |                                                                                                                                                                                                                                                                                                                                                                                                                        |
|---------------------------------|------------------------------------------------------------------------------------------------------------------------------------------------------------------------------------------------------------------------------------------------------------------------------------------------------------------------------------------------------------------------------------------------------------------------|
| Journal:                        | <i>BMJ Open</i>                                                                                                                                                                                                                                                                                                                                                                                                        |
| Manuscript ID                   | bmjopen-2021-053964.R2                                                                                                                                                                                                                                                                                                                                                                                                 |
| Article Type:                   | Original research                                                                                                                                                                                                                                                                                                                                                                                                      |
| Date Submitted by the Author:   | 07-Mar-2022                                                                                                                                                                                                                                                                                                                                                                                                            |
| Complete List of Authors:       | Sicras-Mainar, Antoni; Atrys Health SA, HEOR<br>Gómez Rodríguez, Belén; University Hospital Virgen de la Victoria, Pulmonology Service<br>Traseira-Lugilde, Susana; Mundipharma Pharmaceuticals SL, Medical Department<br>Fernández-Sánchez, Toni; Mundipharma Pharmaceuticals SL, Medical Department<br>Velasco Garrido, José Luis; University Hospital Virgen de la Victoria, Virgen de la Victoria Hospital Complex |
| <b>Primary Subject Heading</b>: | General practice / Family practice                                                                                                                                                                                                                                                                                                                                                                                     |
| Secondary Subject Heading:      | Respiratory medicine                                                                                                                                                                                                                                                                                                                                                                                                   |
| Keywords:                       | Asthma < THORACIC MEDICINE, RESPIRATORY MEDICINE (see Thoracic Medicine), THERAPEUTICS                                                                                                                                                                                                                                                                                                                                 |
|                                 |                                                                                                                                                                                                                                                                                                                                                                                                                        |

SCHOLARONE™  
Manuscripts



I, the Submitting Author has the right to grant and does grant on behalf of all authors of the Work (as defined in the below author licence), an exclusive licence and/or a non-exclusive licence for contributions from authors who are: i) UK Crown employees; ii) where BMJ has agreed a CC-BY licence shall apply, and/or iii) in accordance with the terms applicable for US Federal Government officers or employees acting as part of their official duties; on a worldwide, perpetual, irrevocable, royalty-free basis to BMJ Publishing Group Ltd ("BMJ") its licensees and where the relevant Journal is co-owned by BMJ to the co-owners of the Journal, to publish the Work in this journal and any other BMJ products and to exploit all rights, as set out in our [licence](#).

The Submitting Author accepts and understands that any supply made under these terms is made by BMJ to the Submitting Author unless you are acting as an employee on behalf of your employer or a postgraduate student of an affiliated institution which is paying any applicable article publishing charge ("APC") for Open Access articles. Where the Submitting Author wishes to make the Work available on an Open Access basis (and intends to pay the relevant APC), the terms of reuse of such Open Access shall be governed by a Creative Commons licence – details of these licences and which [Creative Commons](#) licence will apply to this Work are set out in our licence referred to above.

Other than as permitted in any relevant BMJ Author's Self Archiving Policies, I confirm this Work has not been accepted for publication elsewhere, is not being considered for publication elsewhere and does not duplicate material already published. I confirm all authors consent to publication of this Work and authorise the granting of this licence.



**Treatment persistence and exacerbations in asthmatic patients initiating treatment with inhaled corticosteroids and beta-adrenergic agonists: retrospective cohort study**

Antoni Sicras-Mainar<sup>1</sup>  
 Belén Gómez Rodríguez<sup>2</sup>  
 Susana Traseira-Lugilde<sup>3</sup>  
 Toni Fernández-Sánchez<sup>3</sup>  
 José Luis Velasco Garrido<sup>2</sup>

[ansicras@atryshealth.com](mailto:ansicras@atryshealth.com)  
[belen.gomez.rodriguez.sspa@juntadeandalucia.es](mailto:belen.gomez.rodriguez.sspa@juntadeandalucia.es)  
[Susana.Traseira@mundipharma.es](mailto:Susana.Traseira@mundipharma.es)  
[Toni.Fernandez@mundipharma.es](mailto:Toni.Fernandez@mundipharma.es)  
[jvelascogarrido@hotmail.com](mailto:jvelascogarrido@hotmail.com)

1) Scientific Direction, Atrys Health, Barcelona. Spain.  
 2) Pulmonology Service. Virgen de la Victoria Hospital Complex, Malaga, Spain  
 3) Medical Department, Mundipharma Pharmaceuticals SL, Madrid, Spain

**CORRESPONDENCE:**

Antoni Sicras-Mainar  
 Atrys Health SA  
 C/Provença 392, bajos  
 08025 - Barcelona  
 T: +34 934 581 561, E-mail: [ansicras@atryshealth.com](mailto:ansicras@atryshealth.com)

**ABBREVIATIONS**

| Abbreviation     | Description                                           |
|------------------|-------------------------------------------------------|
| ATC              | Anatomical Therapeutic Chemical Classification System |
| BDP/FORM         | Beclomethasone/formoterol                             |
| BUD/FORM         | Budesonide/formoterol                                 |
| FEV <sub>1</sub> | Maximum expiratory volume in the first second         |
| FF/VI            | Fluticasone furoate/vilanterol                        |
| FP/FORM          | Fluticasone propionate/formoterol                     |
| FP/SAL           | Fluticasone propionate/salmeterol                     |
| ICS              | Inhaled corticosteroid                                |
| LABA             | Long-acting beta-2 agonist                            |
| LAMA             | Long-acting muscarinic antagonist                     |

1  
2 36  
3 37 **FUNDING**

4 38 Associates of Vectura licensed a formoterol/fluticasone inhaler to Mundipharma Pharmaceuticals.  
5 39 Mundipharma has since developed, registered, marketed and distributed this product and  
6 40 sponsored this study. This study was designed and completed prior to acquisition of Vectura by  
7 41 Philip Morris International.  
8 42

9 43 **CONFLICT OF INTEREST**

10 44 A. Sicras is an independent consultant funded by Mundipharma with respect to this manuscript. ST  
11 45 and TF are employees of Mundipharma. The other authors state they have no conflict of interest in  
12 46 relation to this study.  
13 47

14 48  
15 49 **AUTHOR CONTRIBUTIONS**

16 50 AS and TF participated in the planning, coordination, conception and design of the study. AS and  
17 51 TF were responsible for data acquisition. AS performed the statistical analysis. AS, BG, ST, TF and  
18 52 JLV reviewed the results report. AS, BG, ST, TF and JLV participated in the critical interpretation of  
19 53 the data obtained, the writing of the manuscript (review) and the final approval of the version to be  
20 54 published. Additionally, AS, BG, ST, TF and JLV were responsible for ensuring the adequacy of all  
21 55 aspects of the study.  
22 56

23 57 **ETHICS APPROVAL**

24 58 His protocol was reviewed and approved at Foundation Redis (Ethical Research Committee;  
25 59 International University of Catalonia; code: ANT-PER-2017-01).  
26 60

27 61 **DATA AVAILABILITY**

28 62 The datasets generated during and/or analyzed during the current study are available from the  
29 63 corresponding author upon reasonable request.  
30 64

31 65 **PATIENT CONSENT FOR PUBLICATION.**

32 66 Not required.  
33 67  
34 68  
35 69  
36 70  
37 71  
38  
39  
40  
41  
42  
43  
44  
45  
46  
47  
48  
49  
50  
51  
52  
53  
54  
55  
56  
57  
58  
59  
60

1  
2 72 **STROBE Statement—Checklist of items that should be included in reports of *observational studies*.**  
3 73

|                              | Item No | Recommendation                                                                                                                                                                                               | Page No |
|------------------------------|---------|--------------------------------------------------------------------------------------------------------------------------------------------------------------------------------------------------------------|---------|
| <b>Title and abstract</b>    | 1       | (a) Indicate the study's design with a commonly used term in the title or the abstract                                                                                                                       | 5       |
|                              |         | (b) Provide in the abstract an informative and balanced summary of what was done and what was found                                                                                                          | 5       |
| <b>Introduction</b>          |         |                                                                                                                                                                                                              |         |
| Background/rationale         | 2       | Explain the scientific background and rationale for the investigation being reported                                                                                                                         | 6       |
| Objectives                   | 3       | State specific objectives, including any prespecified hypotheses                                                                                                                                             | 6       |
| <b>Methods</b>               |         |                                                                                                                                                                                                              |         |
| Study design                 | 4       | Present key elements of study design early in the paper                                                                                                                                                      | 6       |
| Setting                      | 5       | Describe the setting, locations, and relevant dates, including periods of recruitment, exposure, follow-up, and data collection                                                                              | 6-7     |
| Participants                 | 6       | (a) Give the eligibility criteria, and the sources and methods of selection of participants                                                                                                                  | 6-7     |
| Variables                    | 7       | Clearly define all outcomes, exposures, predictors, potential confounders, and effect modifiers. Give diagnostic criteria, if applicable                                                                     | 8       |
| Data sources/<br>measurement | 8*      | For each variable of interest, give sources of data and details of methods of assessment (measurement). Describe comparability of assessment methods if there is more than one group                         | 8       |
| Bias                         | 9       | Describe any efforts to address potential sources of bias                                                                                                                                                    | 8       |
| Study size                   | 10      | Explain how the study size was arrived at                                                                                                                                                                    | 8       |
| Quantitative variables       | 11      | Explain how quantitative variables were handled in the analyses. If applicable, describe which groupings were chosen and why                                                                                 | 8       |
| Statistical methods          | 12      | (a) Describe all statistical methods, including those used to control for confounding                                                                                                                        | 8       |
|                              |         | (b) Describe any methods used to examine subgroups and interactions                                                                                                                                          | 8       |
|                              |         | (c) Explain how missing data were addressed                                                                                                                                                                  | 8       |
|                              |         | (d) If applicable, describe analytical methods taking account of sampling strategy                                                                                                                           | NA      |
|                              |         | (e) Describe any sensitivity analyses                                                                                                                                                                        | NA      |
| <b>Results</b>               |         |                                                                                                                                                                                                              |         |
| Participants                 | 13*     | (a) Report numbers of individuals at each stage of study—eg numbers potentially eligible, examined for eligibility, confirmed eligible, included in the study, completing follow-up, and analysed            | 8       |
|                              |         | (b) Give reasons for non-participation at each stage                                                                                                                                                         | 8       |
|                              |         | (c) Consider use of a flow diagram                                                                                                                                                                           | NA      |
| Descriptive data             | 14*     | (a) Give characteristics of study participants (eg demographic, clinical, social) and information on exposures and potential confounders                                                                     | 8       |
|                              |         | (b) Indicate number of participants with missing data for each variable of interest                                                                                                                          | 8       |
| Outcome data                 | 15*     | Report numbers of outcome events or summary measures                                                                                                                                                         | 9       |
| Main results                 | 16      | (a) Give unadjusted estimates and, if applicable, confounder-adjusted estimates and their precision (eg, 95% confidence interval). Make clear which confounders were adjusted for and why they were included | 9       |
|                              |         | (b) Report category boundaries when continuous variables were categorized                                                                                                                                    | 9       |
|                              |         | (c) If relevant, consider translating estimates of relative risk into absolute risk for a meaningful time period                                                                                             | NA      |
| Other analyses               | 17      | Report other analyses done—eg analyses of subgroups and interactions, and sensitivity analyses                                                                                                               | NA      |

| <b>Discussion</b>        |    |                                                                                                                                                                            |    |
|--------------------------|----|----------------------------------------------------------------------------------------------------------------------------------------------------------------------------|----|
| Key results              | 18 | Summarise key results with reference to study objectives                                                                                                                   | 9  |
| Limitations              | 19 | Discuss limitations of the study, taking into account sources of potential bias or imprecision. Discuss both direction and magnitude of any potential bias                 | 10 |
| Interpretation           | 20 | Give a cautious overall interpretation of results considering objectives, limitations, multiplicity of analyses, results from similar studies, and other relevant evidence | 10 |
| Generalisability         | 21 | Discuss the generalizability (external validity) of the study results                                                                                                      | 10 |
| <b>Other information</b> |    |                                                                                                                                                                            |    |
| Funding                  | 22 | Give the source of funding and the role of the funders for the present study and, if applicable, for the original study on which the present article is based              | 2  |

74  
75  
76

For peer review only

1  
2 77 **Treatment persistence and exacerbations in asthmatic patients initiating treatment with inhaled**  
3 78 **corticosteroids and long-acting beta2-adrenergic agonists: retrospective cohort study**  
4 79  
5 80

6  
7 81 **ABSTRACT**  
8 82

9  
10 83 **Objective.** To determine treatment persistence and exacerbations in patients initiating inhaler  
11 84 treatment with fixed-dose combinations of inhaled corticosteroids/long-acting beta2-adrenergic  
12 85 agonists (ICS/LABA) for the treatment of asthma.

13  
14 86 **Design.** Retrospective observational study conducted by review of electronic medical records  
15 87 (database: Fundacion RedISS).

16  
17 88 **Setting.** Retrospective cohort study. The follow-up period was one year.

18  
19 89 **Participants** The study included patients aged  $\geq 18$  years who started treatment with ICS/LABA  
20 90 and met the inclusion/exclusion criteria.

21  
22 91 **Main outcomes and measures.** The study groups were fluticasone propionate/salmeterol  
23 92 (FP/SAL), beclomethasone/formoterol (BDP/FORM), budesonide/formoterol (BUD/FORM),  
24 93 fluticasone furoate/vilanterol (FF/VI) and fluticasone propionate/formoterol (FP/FORM). The main  
25 94 measurements were persistence, medication possession ratio (MPR), and exacerbations.  
26 95 Statistical significance was established as  $p < 0.05$ .

27  
28 96 **Results.** In total, 3,203 patients were recruited for the study. By groups, 31.1% FP/SAL, 28.6%  
29 97 BDP/FORM, 25.0% BUD/FORM, 8.2% FF/VI, and 7.0% FP/FORM. The mean age was 52.2 years,  
30 98 60.8% were female, and 44.9% had persistent-moderate asthma. Treatment persistence was  
31 99 61.7% (95% CI: 60.0-63.4%) and by study groups it was: FP/SAL: 60.7%, BDP/FORM: 61.2%,  
32 100 BUD/FORM: 60.3%, FF/VI: 66.7% and FP/FORM: 67.6%, ( $p=0.046$ ). MPR by study group was  
33 101 FP/SAL: 74.3, BDP/FORM: 73.8%, BUD/FORM: 74.6%, FF/VI: 79.4% and FP/FORM: 80.6%  
34 102 ( $p=0.028$ ). The mortality rate was 2.9%. By treatment group, exacerbations were FP/SAL: 21.9%  
35 103 (95% CI: 19.3-24.5), BDP/FORM: 22.2% (95% CI: 19.5-24.9), BUD/FORM: 22.8% (95% CI: 19.9-  
36 104 25.7), FF/VI: 17.9% (95% CI: 14.9-20.7) and FP/FORM: 16.0% (95% CI: 12.2-19.3),  $p=0.036$ .

37  
38 105  
39 106 **Conclusions.** Patients undergoing treatment with FP/FORM and FF/VI vs. FP/SAL, BDP/FORM,  
40 107 BUD/FORM, were associated with greater treatment adherence (persistence, MPR) and lower rates  
41 108 of exacerbations. However, further studies will be needed to strengthen the consistency of the  
42 109 results.

43  
44 110  
45 111 **Keywords:** asthma, persistence, exacerbations, ICS/LABA.  
46 112  
47 113

1  
2 114  
3 115 **ARTICLE SUMMARY**  
4 116  
5 117

6 118 **STRENGTHS AND LIMITATIONS OF THIS STUDY**

- 7 119  
8 120  
9 121  
10 122  
11 123  
12 124  
13 125  
14 126  
15 127  
16 128  
17 129  
18 130  
19 131
- Reducing the risk of exacerbations is an important goal in the treatment of asthma. However, in our country there are few studies that evaluate this by analyzing the effect of double inhalation therapy at the level of active ingredient (molecule).
  - The results of the study were obtained in a situation of routine clinical practice, far from the idyllic conditions of randomized clinical trials. This circumstance can be interpreted as a strength of the study, since the data are potentially more generalizable, showing greater external validity of the observed results.
  - This study has the limitations of retrospective observational studies; for example, the possible underreporting of information, the difficulty in measuring the confounding variables and the impossibility of establishing a causal relationship between the variables.

## 132 INTRODUCTION

133 Asthma is a chronic inflammatory airway disease that courses with bronchial hyper-response and  
134 variable airflow blockage<sup>1</sup>. In Spain, the prevalence is around 5%, although there are variations  
135 between geographical areas<sup>2</sup>. Most patients achieve adequate control with inhaled corticosteroids  
136 (ICS) and long-lasting beta-adrenergic agonists (LABA), although some patients require additional  
137 therapy with other medications, including oral corticosteroids (OC)<sup>1-2</sup>.

138  
139 Reducing the risk of exacerbations is an important goal of asthma treatment<sup>3-5</sup>. It is estimated that  
140 30-52% of patients with asthma have exacerbations of varying intensity<sup>2,6</sup>. Factors influencing an  
141 increased risk of exacerbations include previous exacerbations, poor asthma control, limitations on  
142 activity, lower forced expiratory volume in the first second (FEV<sub>1</sub>), exposure to allergens, difficulty  
143 handling inhalation devices and treatment adherence<sup>7</sup>. Studies show anti-asthmatic adherence  
144 rates of <65%<sup>1-2,7</sup>. The most common cause of treatment discontinuation are side effects,  
145 improvements in symptoms and problems in reducing the effect of the drug over time, which lead  
146 to discontinuation being advised or spontaneous abandonment<sup>7-10</sup>.

147  
148 In Spain, there are few studies evaluating the relationship between the adherence rate and the risk  
149 of exacerbations<sup>11</sup>. Persistence (or discontinuation) of treatment is a key factor in disease  
150 progression and the risk of complications. In addition, there is a growing need to conduct studies  
151 representative of the real-life clinical conditions in which medicines are used, so the study may be  
152 of interest. The objective of the study was to evaluate treatment persistence and exacerbations in  
153 patients initiating inhaler treatment with combinations of ICS/LABA for the treatment of asthma in  
154 routine clinical practice.

## PATIENTS AND METHODS

We performed a retrospective observational analysis of electronic medical records (EMR) obtained from the administrative database of the RediSS Foundation (Health services research network; www.rediss.es), a source of secondary data. The primary data came from various primary care centers in Catalonia (Spain), which are computerized with the OMIAPWIN (EMR). Before export to RediSS Foundation, data are rigorously anonymized and it is not possible to identify the territory, health care provider, treating physician, or patient or access any other information that would permit individual identification. This procedure ensures adherence to current law governing the protection of personal data. The population assigned to the centers was mostly urban, of medium-low socioeconomic level.

Patients who sought care and initiated treatment with a fixed dose ICS/LABA combination between 01/01/2015 and 30/06/2016 (recruitment period, index date) were included in the study. The inclusion criteria were: (a)  $\geq 18$  years, (b) patients diagnosed with asthma  $\geq 12$  months before the index date, (c) inclusion in the prescription program (with recorded dose, time interval and duration of each treatment administered;  $\geq 2$  prescriptions during the follow-up period), and (d) ensured regular monitoring ( $\geq 2$  clinical records in the computer system). Exclusion criteria were: (a) patients transferred to other centers, displaced or out-of-area, (b) permanently institutionalized patients, (c) a history of COPD, pulmonary emphysema, bronchiectasis, cystic fibrosis or bronchial neoplasm, and (d) mixed asthma-COPD phenotype (asthma-COPD overlap)<sup>1</sup>.

Five study groups were differentiated according to the initial fixed-dose combination of ICS/LABA: Budesonide /formoterol (BUD/FORM, R03AK07), Beclomethasone /formoterol (BDP/FORM, R03AK08), Fluticasone furoate/vilanterol (FF/VI, R03AK10), Fluticasone propionate/formoterol (FP/FORM, R03AK11) and Fluticasone propionate/salmeterol (FP/SAL, R03AK06). The follow-up period, from the date of inclusion of the patient was one year. Records of asthma patients were obtained using the International Classification of Primary Care in the European Community (ICPC-2; R93)<sup>12</sup>, and/or the International Classification of Diseases (ninth edition) Clinical Modification (ICD-9-MC; 493.x for asthma and/or flare-ups). The diagnosis of asthma was always made at the physician's discretion, according to spirometry values. Exacerbations were defined as an event in the natural course of the disease characterized by acute episodes identified by a progressive increase in breathing difficulties, feeling short of breath, wheezing, chest oppression or a combination of these symptoms, caused by intense airflow obstruction<sup>1</sup>. Outpatients or those attending the emergency department (mild-moderate asthma exacerbation) and hospitalized patients (severe asthma exacerbation) were identified. The record of each exacerbation was obtained to assess the rates before and after the index date, and the time from diagnosis (in years). In addition, the following variables were collected: body mass index (BMI, kg/m<sup>2</sup>), lung function (forced expiratory volume in the first second, FEV<sub>1</sub>), asthma severity (intermittent, mild persistent,



1  
2 194 moderate persistent and severe persistent according to the GEMA criteria<sup>1</sup> at the start of the study  
3 195 before the index date. All-cause deaths were recorded.  
4

5 196  
6 197 Sociodemographic and comorbidity variables collected were age (continuous and by range), sex,  
7 198 and the personal history described in table 1. As a summary variable of general comorbidity: a) the  
8 199 Charlson<sup>13</sup> comorbidity index was used as an approximation to severity, b) the number of chronic  
9 200 comorbidities was obtained, and c) the individual case-mix index was obtained from the Adjusted  
10 201 Clinical Groups (ACG), which is a patient classification system using iso-consumption of  
11 202 resources<sup>14</sup>. The ACG application provides resource utilization bands (RUB), allowing each patient  
12 203 to be grouped into one of five mutually exclusive categories based on their overall morbidity.  
13  
14  
15  
16  
17

18 204  
19 205 The medicines (active substances) indicated for treatment were obtained according to the  
20 206 Anatomical Therapeutic Chemical Classification System (ATC)<sup>15</sup> classification: oral/systemic  
21 207 corticosteroids (CO, H02AB), short-lasting beta-2 agonists (SABA, R03AC), systemic beta-2  
22 208 agonists (xanthines, R03\*), leukotriene receptor antagonists (R03DC), anticholinergics (LAMA,  
23 209 R03BB04: tiotropium bromide) and omalizumab (biologicals, R03DX05). In addition, patients  
24 210 receiving chronic doses of long-lasting oral/systemic corticosteroids were differentiated from those  
25 211 receiving them only for stabilization of an exacerbation. The choice of drug for a specific patient  
26 212 was at the discretion of the physician, as in routine clinical practice. The information was obtained  
27 213 from drug dispensing records. The scheduled dose of ICS administered was classified at low,  
28 214 medium or high<sup>1</sup>. Treatment persistence was calculated from the index date to the discontinuation  
29 215 date in months. The discontinuation date was the date on which the patient switched to another  
30 216 ICS/LABA or interrupted treatment for  $\geq 60$  days without renewing the medication and/or had  $\geq 2$   
31 217 prescriptions dispensed. The rate of treatment persistence was obtained at 6 and 12 months of  
32 218 follow-up. The percentage of therapeutic compliance was calculated based on the medicine  
33 219 possession ratio (MPR)<sup>16</sup>. This was evaluated from the first to the last prescription and represented  
34 220 the number of days of medication dispensed according to the number of days on treatment from  
35 221 the index date.  
36  
37  
38  
39  
40  
41  
42  
43  
44  
45

46 222  
47 223 Records were validated to ensure the quality of the results. A descriptive-univariate statistical  
48 224 analysis was carried out. Qualitative data were described using absolute and relative frequencies  
49 225 and quantitative data as means and standard deviation (SD). The 95% confidence intervals (CI)  
50 226 used to estimate parameters were based on the total number of subjects with no missing values.  
51 227 The normality of the distribution was assessed using the Kolmogorov-Smirnov test. In the bivariate  
52 228 analysis, ANOVA, the Chi squared test and comparison of means were used for paired data. A  
53 229 multiple linear regression model was used to obtain the variables associated with the number of  
54 230 exacerbations (dependent variables; procedure: consecutive steps). The covariates included in the  
55 231 model were: sex, age, general comorbidity (RUB), FEV<sub>1</sub>, disease duration and asthma severity.  
56  
57  
58  
59  
60

1  
2 232 Persistence was assessed using Kaplan-Meier curves (Log rank procedure; Mantel-Cox). The  
3 233 analysis was made using SPSSWIN version 23. Statistical significance was established as  $p < 0.05$ .

4 234  
5 235 *Ethics Approval: His protocol was reviewed and approved at Foundation RediSS (Ethical Research*  
6 236 *Committee; International University of Catalonia; code: ANT-PER-2017-01).*

7 237  
8 238

9 239 **Patient and public involvement**

10 240 Patients/the public were not involved in developing this research question, designing the study, or  
11 241 providing input to study conduct.

12 242

13  
14  
15  
16  
17  
18  
19  
20  
21  
22  
23  
24  
25  
26  
27  
28  
29  
30  
31  
32  
33  
34  
35  
36  
37  
38  
39  
40  
41  
42  
43  
44  
45  
46  
47  
48  
49  
50  
51  
52  
53  
54  
55  
56  
57  
58  
59  
60

For peer review only

## RESULTS

Of an initial population of 8,725 subjects diagnosed with asthma (prevalence: 5.4%; 95% CI: 5.2-5.7%), 3,203 patients who met the inclusion/exclusion criteria and could be followed during the study period were analysed. Table 1 shows the baseline characteristics of participants according to the five ICS/LABA study groups. The mean age was 52.2 years, 60.8% were women, the mean RUB was 2.9 points, and the mean Charlson index was 0.7 points. Allergic rhinitis (62.3%), dyslipidemia (41%), gastroesophageal reflux (39.6%) and high blood pressure (28.4%) were the most frequent comorbidities: 44.9% of patients had persistent-moderate asthma, with a mean FEV<sub>1</sub> of 74.6%. According to the initial ICS/LABA prescribed, the study groups were as follows: 31.1% (N=996) FP/SAL, 28.6% (N=917) BDP/FORM, 25% (N=802) BUD/FORM, 8.2% (N=263) FF/VI and 7.0% (N=225) FP/FORM. There was acceptable comparability in the baseline characteristics of the study groups.

Medication administered and treatment adherence (persistence and MPR) during the follow-up period according to the study groups are detailed in table 2: 95.7% of patients were receiving short-term beta-2 agonists (SABA) as rescue treatment, 27.7% were receiving oral corticosteroids (20% for regular/chronic use) and 18.2% leukotriene antagonists. There was acceptable homogeneity between the groups. Treatment persistence at 12 months was 61.7% (95% CI: 60-63.4%) and, by study group, was as follows: FP/SAL: 60.7%, BDP/FORM: 61.2%, BUD/FORM: 60.3%, FF/VI: 66.7% and FP/FORM: 67.6% (p=0.046). The MPR was FP/SAL: 74.3%, BDP/FORM: 73.8%, BUD/FORM: 74.6%, FF/VI: 79.4% and FP/FORM: 80.6% (p=0.028). The mortality rate was 2.9%.

Exacerbations by study group are described in table 3. Overall, 21.5% of patients had some form of exacerbation, and the rates were slightly lower in groups treated with FP/FORM and FF/VI. The percentages of patients with exacerbations according to study group were FP/SAL: 21.9% (95% CI: 19.3-24.5), BDP/FORM: 22.2% (95% CI: 19.5-24.9), BUD/FORM: 22.8% (95% CI: 19.9-25.7), FF/VI: 17.9% (95% CI: 14.9-20.7) and FP/FORM: 16.0% (95% CI: 12.2-19.3), p=0.036. The differences were most evident in patients with severe exacerbations (7.9%, 6.0%, 7.9%, 6.8% and 4.0%, respectively (p<0.001)). The reductions in exacerbations from baseline to 12 months were: FP/SAL: -6.8%, BDP/FORM: -5.9%, BUD/FORM: -6.1%, FF/VI: -8.6% and FP/FORM: -9.3%, respectively (p=0.037). In the multivariate model, the number of exacerbations during the follow-up was associated with previous exacerbations ( $\beta$ -0.798), FEV<sub>1</sub> ( $\beta$ -0.075) and persistence ( $\beta$ -0.011) (p<0.033). The model determination coefficient was 85.1%. Figure 1 details the percentage of exacerbations according to asthma severity and figure 2 shows the median treatment persistence during the follow-up period.

**DISCUSSION**

The results of the study show that patients initiating fixed-dose treatment with FP/FORM and FF/VI were associated with increased persistence and MPR, resulting in fewer exacerbations compared with other ICS/LABA. Only patients receiving FP/FORM were associated with a lower rate of severe asthma exacerbations. FP/FORM and FF/VI, which are newer combinations, were less often prescribed (7% and 8.2%, respectively).

ICS /LABA are the basis of persistent asthma treatment, although the literature reviewed shows a low rate of adherence to medication (<65% per year)<sup>11,16-17</sup>. A review of 19 studies shows treatment adherence ranged between 22% and 63% and that 24% of exacerbations and 60% of asthma-related hospitalizations were attributable to poor adherence<sup>18</sup>. Zhang<sup>19</sup> found a persistence of 33.6% in children with persistent asthma on monotherapy. Our results are similar or perhaps slightly higher than those reported but are still low. There may be several possible explanations: a) the method of measuring persistence/MPR, b) the dose indicated at the beginning of the study, c) ours is a more recent study, d) the patients who sought care assiduously attended check-ups, and/or e) are subject to specific nursing follow-up. In addition, in the studies reviewed, therapeutic non-compliance was associated with young patients with mild asthma, while fixed combinations improve adherence, as confirmed by our results<sup>18,20</sup>.

Our results show that 21.5% of patients had some form of exacerbation, and that the rate was slightly lower in patients treated with FP/FORM and FF/VI. The risk of exacerbations was associated with clinical severity (FEV<sub>1</sub>), previous exacerbations, limitations on activity, allergic rhinitis, insufficient preventive anti-inflammatory treatment and/or poor compliance with the prescribed treatment<sup>20</sup>. Schmidt<sup>21</sup>, in a year-long prospective observational, found that treatment with FP/FORM was associated with clinical improvements in asthma (degree of control, severe exacerbation, quality of life and lung function). Usmani<sup>22</sup> studied patients with controlled asthma and found that a reduction in the dose of FP/FORM did not affect exacerbations and was well tolerated. A comparative review of the rate of severe asthma exacerbations observed in clinical trials of different fixed-dose combinations of ICS/LABA by Papi<sup>20</sup> found that the incidence of exacerbations with FP/FORM was lower than that for other combinations of ICS/LABA (especially those that result in hospitalization) and that the difference cannot be explained solely by the characteristics of the studies (design, population, etc.) and could be related to the pharmacological (molecular) characteristics of the combination. A clinical trial of FF/VI also found a lower rate of asthma exacerbations, although it was similar to FP/SAL<sup>23</sup>. Another recent trial found that FF/VI showed better asthma control than habitual optimized treatment, but that there were no differences in the rate of asthma exacerbations<sup>24</sup>. With design limitations, our data is in line with the literature consulted<sup>20,25</sup>. However, the different definitions of asthma exacerbation make comparisons difficult;

1  
2 316 in our study the definition of exacerbation was at the clinician's discretion and was based on the  
3 317 use of health resources<sup>26-27</sup>.

4  
5 318  
6 319 The study has some limitations. Principally those typical of retrospective studies (underreporting /  
7 320 absence of information). In this sense, the categorization of the disease (asthma) and the possible  
8 321 classification bias of patients, including the possible inaccuracy of diagnostic coding about the  
9 322 diagnosis of asthma and other comorbidities, are some examples, attributable to the information  
10 323 system. To reduce this bias, a validation of the variables was carried out before analysis. The  
11 324 definition of exacerbation was analyzed based on the use of resources (administered drugs,  
12 325 hospital admissions) in the absence of a specific coding system. However, it is a consensus criterion  
13 326 in retrospective studies and should affect all the cohorts analyzed in a similar way. In addition, other  
14 327 unmeasured factors could have influenced the results, for example, the socioeconomic level of  
15 328 patients, environmental/work exposure, evolution of the prescribed pharmacological dose,  
16 329 verification of the inhalation technique, including bronchoconstrictor therapy and/or the  
17 330 differentiation of phenotypes. In addition, based on the demand for medical care, non-disease  
18 331 factors may have influenced the results, such as access to health resources, comorbidity or patient  
19 332 specifics, which could cause worsening episodes not to be reported by the patient and therefore  
20 333 remain untreated. It is possible that through a prospective study, some of these factors can be  
21 334 minimized. The capturing patient behavior through treatment persistence cannot be directly  
22 335 assessed through structured data available in electronic databases. Time to discontinuation is  
23 336 assumed to be a proxy to estimate patient persistence. In addition, the external validity of the results  
24 337 with respect to the representativeness of the population and the small number of patients per study  
25 338 group should also be considered as limitations. When using an efficient inhaler therapy<sup>24-25</sup>, the  
26 339 factors that most influence compliance include the type of device, the technique used, and the  
27 340 health-education instructions received. However, these limitations should affect all the analyzed  
28 341 cohorts in a similar way and should not affect the external validity of the results.  
29  
30  
31  
32  
33  
34  
35  
36  
37  
38  
39  
40  
41  
42  
43

44 343 The future perspectives offered by this study are those of its replication in other health institutions  
45 344 and interventional strategies aimed at promoting patient self-care (structured and individualized  
46 345 educational programs). In conclusion, patients receiving FP/FORM and FF/VI were associated with  
47 346 increased treatment adherence (persistence, MPR) and lower rates of exacerbations. However,  
48 347 further studies will be needed to strengthen the consistency of the results.  
49  
50  
51  
52  
53  
54  
55  
56  
57  
58  
59  
60

**REFERENCES**

1. Spanish guide to asthma management (GEMA<sup>4,3</sup>). Version 2018. Available at: <https://www.gemasma.com>. Accessed: January 2021.
2. Vila-Rigat R, Panads Valls R, Hernandez Huet E, et al. Prevalence of Work-Related Asthma and its Impact in Primary Health Care. *Arch Bronconeumol*. 2015;51:449-55.
3. JR Castle, Peters SP, Busse WW. Asthma Exacerbations: Pathogenesis, Prevention, and Treatment. *J Allergy Clin Immunol Pract*. 2017;5:918-27.
4. Stenson EK, Tchou MJ, Wheeler DS. Management of acute asthma exacerbations. *Curr Opin Pediatr*. 2017;29:305-10.
5. Quirce S, Delgado J, Entrenas LM, et al.; ASMAFORUM II Group. Quality Indicators of Asthma Care Derived From the Spanish Guidelines for Asthma Management (GEMA 4.0): A Multidisciplinary Team Report. *J Investig Allergol Clin Immunol*. 2017;27:69-73.
6. FitzGerald JM, Barnes PJ, Chipps BE, Jenkins CR, O'Byrne PM, Pavord ID, Reddel HK. The burden of exacerbations in mild asthma: a systematic review. *ERJ Open Res*. 2020;6(3):00359-2019.
7. Darba J, Ramírez G, Sicras A, García-Bujalance L, Torvinen S, Sánchez-de la Rosa R. Identification of factors involved in medication compliance: incorrect inhaler technique of asthma treatment leads to poor compliance. *Patient Prefer Adherence*. 2016;10:135-45.
8. Sicras-Mainar A, Huerta A, Sánchez D, Navarro-Artieda R. Use of resources and costs associated with non-adherence to inhaled corticosteroid treatment in asthma. *Semergen*. 2018;44:13-22.
9. Vasbinder EC, Belitser SV, Souverein PC, van Dijk L, Vulto AG, van den Bemt PM. Non-adherence to inhaled corticosteroids and the risk of asthma exacerbations in children. *Patient Prefer Adherence*. 2016; 10:531-8.
10. Dima AL, Hernandez G, Cunillera O, Ferrer M, de Bruin M; ASTRO-LAB group. Asthma inhaler adherence determinants in adults: systematic review of observational data. *Eur Respir J*. 2015;45:994-1018.
11. Sicras-Mainar A, Traseira-Lugilde S, Fernández-Sánchez T, Navarro-Artieda R. Treatment persistence and resources use with inhaled fixed-dose combinations of corticosteroids and long-acting  $\beta$ -adrenergic agonists for the treatment of asthma: A population-based retrospective study. *Semergen*. 2018;44(7):472-484.
12. Lamberts H, Wood M, Hofmans-Okkes AM (eds). The International Classification of Primary Care in the European Community. With a multi-language layer. Oxford: Oxford University Press, 1993.
13. Charlson ME, Pompei P, Ales KL, Mackenzie CR. A new method of classifying prognostic comorbidity in longitudinal studies: development and validation. *J Chronic Dis*. 1987;40:373-383.
14. Sicras-Mainar A, Navarro-Artieda R. Adjusted clinical groups: a patient classification system through risk adjustment. *Rev Med Exp Public Health*. 2013;30:308-14. Peru
15. The Anatomical Therapeutic Chemical Classification System with Defined Daily Doses (ATC/DDD): World Health Organization. Available at: <http://www.who.int/classifications/atcddd/en/>. Accessed: 10/04/2020.
16. Mattke S, Martorell F, Hong SY, Sharma P, Cuellar A, Lurie N. Anti-inflammatory medication adherence and cost and utilization of asthma care in a commercially insured population. *J Asthma*. 2010;47:323-9.

- 1  
2 407 17. Voshaar T, Kostev K, Rex J, Schroder-Bernhardi D, Maus J, Munzel U. A retrospective database  
3 408 analysis on persistence with inhaled corticosteroid therapy: comparison of two dry powder inhalers  
4 409 during asthma treatment in Germany. *Int J Clin Pharmacol Ther.* 2012;50:257-64.  
5 410
- 6 411 18. Bårnes CB, Ulrik CS. Asthma and Adherence to Inhaled Corticosteroids: Current Status and Future  
7 412 Perspectives. *Respiratory Care.* 2015;60(3):455-68.  
8 413
- 9 414 19. Zhang Q, Taylor SD, Sazonov V, Thomas M, Price D. Suboptimal persistence with inhaled  
10 415 corticosteroid monotherapy among children with persistent asthma in the in the UK. *Prim Care Respir J.*  
11 416 2011;20:97-101.  
12 417
- 13 418 20. Daddy A, Mansur AH, Pertseva T, Kaiser K, McIver T, Grothe B, Dissanayake S. Long-Term  
14 419 Fluticasone Propionate/Formoterol Fumarate Combination Therapy Is Associated with a Low Incidence  
15 420 of Severe Asthma Exacerbations. *J Aerosol Med Lung Drug Deliv.* 2016;29:346-61.  
16 421
- 17 422 21. Schmidt O, Petro W, Hoheisel G, Kannies F, Oepen P, Langer-Brauburger B. Real-life effectiveness  
18 423 of asthma treatment with a fixed-dose fluticasone/formoterol pressurised metered-dose inhaler - Results  
19 424 from a non-interventional study. *Respir Med.* 2017;131:166-174.  
20 425
- 21 426 22. Usmani OS, Kempainen A, Gardener E, et al. A Randomized Pragmatic Trial of Changing and  
22 427 Stepping Down Fluticasone/Formoterol in Asthma. *J Allergy Clin Immunol Pract.* 2017;5:1378-87.  
23 428
- 24 429 23. Woodcock A, Bleecker ER, Lotvall J, et al. Efficacy and safety of fluticasone furoate/vilanterol  
25 430 compared with fluticasone propionate/salmeterol combination in adult and adolescent patients with  
26 431 persistent asthma: a randomized trial. *Chest.* 2013;144:1222-9.  
27 432
- 28 433 24. Woodcock A, Vestbo J, Bakerly ND, et al.; Salford Lung Study Investigators. Effectiveness of  
29 434 fluticasone furoate plus vilanterol on asthma control in clinical practice: an open-label, parallel group,  
30 435 randomised controlled trial. *Lancet.* 2017;390:2247-55.  
31 436
- 32 437 25. Shower FM, Ni Chroinin M, Greenstone I, Lasserson TJ. Addition of long-acting beta2-agonists to  
33 438 inhaled steroids versus higher dose inhaled steroids in adults and children with persistent asthma.  
34 439 *Cochrane Database Syst Rev.* 2010;(4):CD005533.  
35 440
- 36 441 26. Lewis A, Torvinen S, Dekhuijzen PNR, Chrystyn H, Watson AT, Blackney M, Plich A. The economic  
37 442 burden of asthma and chronic obstructive pulmonary disease and the impact of poor inhalation  
38 443 technique with commonly prescribed dry powder inhalers in three European countries. *BMC Health  
39 444 Services Research.* 2016;16:251.  
40 445
- 41 446 27. Normansell R, Kew KM, Stovold E. Interventions to improve adherence to inhaled steroids for  
42 447 asthma. *Cochrane Database Syst Rev.* 2017;4:CD012226.  
43 448  
44  
45  
46  
47  
48  
49  
50  
51  
52  
53  
54  
55  
56  
57  
58  
59  
60

Table 1. Baseline characteristics of the series studied by study groups

| Study groups                     | FP/SAL        | BDP/FORM      | BUD/FORM      | FF/VI        | FP/FORM     | p     |
|----------------------------------|---------------|---------------|---------------|--------------|-------------|-------|
| Number of patients, %            | N=996 (31.1%) | N=917 (28.6%) | N=802 (25.0%) | N=263 (8.2%) | N=225 (7%)  |       |
| <i>Sociodemographic features</i> |               |               |               |              |             |       |
| Mean age, years                  | 52.3 (19.3)   | 53.0 (18.5)   | 51.0 (16.8)   | 52.5 (17.7)  | 52.8 (17.1) | 0.245 |
| Sex (female)                     | 60.0%         | 61.1%         | 61.6%         | 61.6%        | 60.4%       | 0.968 |
| <i>General comorbidity</i>       |               |               |               |              |             |       |
| Mean diagnoses                   | 6.8 (3.9)     | 6.4 (3.9)     | 6.2 (3.6)     | 6.3 (3.6)    | 6.8 (3.8)   | 0.075 |
| Charlson index                   | 0.8 (0.8)     | 0.7 (0.8)     | 0.7 (0.6)     | 0.7 (0.8)    | 0.8 (0.9)   | 0.097 |
| Mean RUB                         | 3.0 (0.7)     | 2.9 (0.7)     | 2.9 (0.8)     | 3.0 (0.8)    | 2.9 (0.7)   | 0.198 |
| 1 (very low comorbidity)         | 4.1%          | 3.6%          | 8.2%          | 6.1%         | 4.9%        |       |
| 2 (low comorbidity)              | 10.3%         | 20.4%         | 12.5%         | 13.3%        | 12.0%       |       |
| 3 (moderate comorbidity)         | 71.1%         | 65.5%         | 63.1%         | 56.7%        | 67.6%       |       |
| 4 (high comorbidity)             | 14.0%         | 9.9%          | 15.8%         | 23.6%        | 14.7%       |       |
| 5 (very high comorbidity)        | 0.5%          | 0.5%          | 0.4%          | 0.4%         | 0.9%        | 0.111 |
| <i>Associated comorbidity</i>    |               |               |               |              |             |       |
| High blood pressure              | 29.9%         | 28.9%         | 29.1%         | 29.3%        | 29.3%       | 0.991 |
| Diabetes mellitus                | 13.4%         | 12.8%         | 13.0%         | 13.3%        | 12.9%       | 0.996 |
| Dyslipidemia                     | 41.0%         | 41.3%         | 41.3%         | 40.7%        | 39.8%       | 0.811 |
| Obesity                          | 27.9%         | 28.6%         | 27.7%         | 26.2%        | 27.6%       | 0.963 |
| Ischemic heart disease           | 4.3%          | 4.0%          | 4.0%          | 3.8%         | 4.0%        | 0.994 |
| Cerebrovascular accident         | 7.3%          | 7.0%          | 7.0%          | 6.8%         | 6.7%        | 0.995 |
| Cardiovascular event             | 11.8%         | 9.2%          | 9.1%          | 10.6%        | 10.2%       | 0.272 |
| Depressive syndrome              | 19.5%         | 19.6%         | 20.2%         | 20.9%        | 20.4%       | 0.982 |
| Malignancies                     | 10.9%         | 10.5%         | 10.3%         | 11.8%        | 10.2%       | 0.964 |
| Allergic rhinitis                | 61.7%         | 63.1%         | 61.8%         | 63.5%        | 62.2%       | 0.959 |
| Nasal polyposis                  | 15.5%         | 15.4%         | 15.3%         | 14.1%        | 16.4%       | 0.969 |
| Gastroduodenal reflux            | 39.1%         | 40.9%         | 38.0%         | 41.1%        | 40.9%       | 0.739 |
| <i>Asthma severity</i>           |               |               |               |              |             |       |
| Intermittent                     | 13.0%         | 14.9%         | 12.0%         | 12.5%        | 12.0%       |       |
| Mild persistent                  | 25.0%         | 21.5%         | 24.6%         | 25.1%        | 25.3%       |       |
| Moderate persistent              | 44.5%         | 45.1%         | 45.3%         | 43.3%        | 45.4%       |       |
| Severe/severe persistent         | 17.6%         | 18.4%         | 18.2%         | 19.0%        | 18.2%       | 0.844 |
| <i>Other variables</i>           |               |               |               |              |             |       |
| BMI, kg/m <sup>2</sup>           | 28.4 (5)      | 28.6 (5.0)    | 28.4 (5.0)    | 28.6 (5.5)   | 27.9 (4.9)  | 0.228 |
| FEV <sub>1</sub> (% theoretical) | 74.8%         | 74.3%         | 74.7%         | 74.6%        | 74.8%       | 0.954 |

Values expressed as percentage or mean (standard deviation), p: statistical significance. RUB: Resource utilization bands.

BMI: Body mass index, kg/m<sup>2</sup>, FEV<sub>1</sub>: Forced expiratory volume in the first second.

Groups: Fluticasone propionate/salmeterol (FP/SAL), Beclomethasone /formoterol (BDP/FORM), Budesonide/formoterol (BUD/FORM), Fluticasone furoate/vilanterol (FF/VI) and Fluticasone propionate /formoterol (FP/FORM).



Table 2. Medication administered and treatment persistence during the follow-up period

| Study groups                         | FP/SAL        | BDP/FORM      | BUD/FORM    | FF/VI        | FP/FORM      | p     |
|--------------------------------------|---------------|---------------|-------------|--------------|--------------|-------|
| Number of patients, %                | N=996 (31.1%) | N=917 (28.6%) | N=802 (25%) | N=263 (8.2%) | N=225 (7.0%) |       |
| <i>Medication use</i>                |               |               |             |              |              |       |
| Oral corticosteroids                 | 24.6%         | 22.8%         | 26.7%       | 25.5%        | 24.9%        | 0.465 |
| Oral corticosteroids for chronic use | 22.0%         | 18.5%         | 20.2%       | 18.6%        | 18.7%        | 0.373 |
| Systemic antibiotics                 | 10.0%         | 9.2%          | 10.1%       | 10.3%        | 10.1%        | 0.959 |
| Short-lasting beta-2 agonists        | 90.0%         | 93.0%         | 91.2%       | 89.5%        | 92.2%        | 0.221 |
| Long-lasting anticholinergics        | 17.0%         | 15.2%         | 13.8%       | 16.0%        | 13.8%        | 0.414 |
| Systemic beta-2 agonists (xanthines) | 3.8%          | 3.5%          | 3.2%        | 5.7%         | 3.1%         | 0.431 |
| Leukotriene receptor antagonists     | 17.7%         | 17.4%         | 19.5%       | 17.5%        | 19.6%        | 0.782 |
| Biologicals: omalizumab              | 1.3%          | 1.4%          | 1.2%        | 1.5%         | 1.3%         | 0.997 |
| <i>Inhaled corticosteroid doses</i>  |               |               |             |              |              |       |
| Low                                  | 10.5%         | 9.8%          | 10.1%       | 11.1%        | 10.7%        |       |
| Average                              | 47.1%         | 46.5%         | 45.0%       | 46.2%        | 47.1%        |       |
| High                                 | 42.4%         | 43.7%         | 44.9%       | 42.7%        | 42.2%        | 0.547 |
| <i>Other variables</i>               |               |               |             |              |              |       |
| Time from diagnosis, years           | 12.5 (4.5)    | 12.7 (4.4)    | 12.8 (4.2)  | 12.6 (3.9)   | 12.3 (3.9)   | 0.373 |
| Treatment possession, months         | 8.9 (3.6)     | 8.9 (3.4)     | 9.0 (3.3)   | 9.6 (3.3)*   | 9.7 (3.1)*   | 0.046 |
| Duration of treatment, months        | 9.9 (3.5)     | 9.7 (3.6)     | 10.0 (3.5)  | 10.2 (3.4)*  | 10.3 (3.2)*  | 0.036 |
| Medication possession rate           | 74.3%         | 73.8%         | 74.6%       | 79.4%*       | 80.6%*       | 0.028 |
| 95% CI                               | 71.6-77.0%    | 70.5-76.3%    | 71.6-77.6%  | 74.5-84.3%   | 75.4-85.8%   |       |
| <i>Treatment persistence, months</i> |               |               |             |              |              |       |
| 6 months                             | 81.9%         | 81.2%         | 82.4%       | 86.0%*       | 87.6%*       | 0.014 |
| 12 months                            | 60.7%         | 61.2%         | 60.3%       | 66.7%*       | 67.6%*       | 0.046 |
| Death                                | 3.0%          | 2.7%          | 3.1%        | 2.3%         | 2.7%         | 0.954 |

Values expressed as percentage or mean (SD: standard deviation), p: statistical significance. CI: Confidence intervals.

Groups: Fluticasone propionate /salmeterol (FP/SAL), Beclomethasone/formoterol (BDP/FORM), Budesonide/formoterol (BUD/FORM), Fluticasone furoate/vilanterol (FF/VI) and Fluticasone propionate/formoterol (FP/FORM). \*: Statistically significant results (observed > expected).

Table 3. Exacerbations by study groups

| Study groups                               | FP/SAL        | BDP/FORM      | BUD/FORM    | FF/VI        | FP/FORM    | pd     |
|--------------------------------------------|---------------|---------------|-------------|--------------|------------|--------|
| Number of patients, %                      | N=996 (31.1%) | N=917 (28.6%) | N=802 (25%) | N=263 (8.2%) | N=225 (7%) |        |
| <b>Follow-up period (one year)</b>         |               |               |             |              |            |        |
| Exacerbations, %                           | 21.9%         | 22.2%         | 22.8%       | 17.9%*       | 16.0%*     | 0.036  |
| Mean exacerbations                         | 0.4 (0.8)     | 0.4 (0.8)     | 0.4 (0.8)   | 0.3 (0.8)    | 0.3 (0.8)  | 0.087  |
| Number of exacerbations/year               |               |               |             |              |            |        |
| 0                                          | 78.1%         | 78.3%         | 77.2%       | 82.1%        | 84.0%      |        |
| 1                                          | 15.0%         | 14.9%         | 13.8%       | 9.9%         | 7.1%       |        |
| 2                                          | 2.9%          | 2.6%          | 5.5%        | 1.9%         | 5.3%       |        |
| 3+                                         | 4.0%          | 4.1%          | 3.5%        | 6.1%         | 3.6%       | <0.001 |
| <b>Patients with exacerbations</b>         |               |               |             |              |            |        |
| Mild-Moderate                              | 20.1%         | 21.7%         | 22.2%       | 17.5%*       | 16.0%*     | <0.001 |
| Severe (hospital admission)                | 7.9%          | 6.0%          | 7.9%        | 6.8%         | 4.0%*      | <0.001 |
| <b>Previous year (pre-index)</b>           |               |               |             |              |            |        |
| Exacerbations, %                           | 28.7%         | 28.1%         | 28.9%       | 25.5%        | 25.3%      | 0.698  |
| Mean exacerbations                         | 0.5 (0.9)     | 0.5 (0.9)     | 0.5 (0.9)   | 0.5 (1.0)    | 0.4 (0.9)  | 0.973  |
| Number of exacerbations/year               |               |               |             |              |            |        |
| 0                                          | 71.3%         | 71.9%         | 71.1%       | 74.5%        | 74.7%      |        |
| 1                                          | 17.1%         | 15.3%         | 15.1%       | 14.1%        | 15.6%      |        |
| 2                                          | 5.9%          | 8.4%          | 9.1%        | 3.0%         | 2.7%       |        |
| 3+                                         | 5.7%          | 4.5%          | 4.7%        | 8.4%         | 7.1%       | <0.001 |
| <b>Patients with exacerbations</b>         |               |               |             |              |            |        |
| Mild-Moderate                              | 27.5%         | 27.4%         | 28.7%       | 24.1%        | 25.4%      | 0.111  |
| Severe (hospital admission)                | 11.7%         | 10.8%         | 12.2%       | 10.6%        | 10.7%      | 0.217  |
| <b>Differences between the two periods</b> |               |               |             |              |            |        |
| Exacerbations, %                           | -6.8%         | -5.9%         | -6.1%       | -8.6%*       | -9.3%*     | 0.037  |
| Mild-Moderate                              | -7.4%         | -5.7%         | -6.5%       | -7.6%        | -8.4%      | 0.282  |
| Severe (hospital admission)                | -3.8%         | -4.8%         | -4.4%       | -5.8%*       | -6.7%*     | 0.044  |

Values expressed as percentage or mean (SD: standard deviation), p: statistical significance.

Groups: Fluticasone propionate /salmeterol (FP/SAL), Beclomethasone/formoterol (BDP/FORM), Budesonide/formoterol (BUD/FORM), Fluticasone furoate/vilanterol (FF/VI) and Fluticasone propionate/formoterol (FP/FORM). \*: Statistically significant results (effects observed > expected).

Figure 1. Percentage of patients with exacerbations according to their severity

Values expressed as a percentage of patients with exacerbations during the follow-up year.

In grey, statistically significant results ( $p < 0.05$ ).

Groups: Fluticasone propionate /salmeterol (FP/SAL), Beclomethasone/formoterol (BDP/FORM), Budesonide/formoterol (BUD/FORM), Fluticasone furoate/vilanterol (FF/VI) and Fluticasone propionate/formoterol (FP/FORM).

For peer review only

Figure 2. Median treatment persistence during the follow-up period

Kaplan-Meier Curve: Log Rank Procedure (Mantel-Cox): Chi-square-9,643; p-0.039.  
Groups: Fluticasone propionate /salmeterol (FP/SAL), Beclomethasone/formoterol (BDP/FORM), Budesonide/formoterol (BUD/FORM), Fluticasone furoate/vilanterol (FF/VI) and Fluticasone propionate /formoterol (FP/FORM).

For peer review only

1  
2  
3  
4  
5  
6  
7  
8  
9  
10  
11  
12  
13  
14  
15  
16  
17  
18  
19  
20  
21  
22  
23  
24  
25  
26  
27  
28  
29  
30  
31  
32  
33  
34  
35  
36  
37  
38  
39  
40  
41  
42  
43  
44  
45  
46  
47  
48  
49  
50  
51  
52  
53  
54  
55  
56  
57  
58  
59  
60

1  
2  
3  
4  
5  
6  
7  
8  
9  
10  
11  
12  
13  
14  
15  
16  
17  
18  
19  
20  
21  
22  
23  
24  
25  
26  
27  
28  
29  
30  
31  
32  
33  
34  
35  
36  
37  
38  
39  
40  
41  
42  
43  
44  
45  
46  
47  
48  
49  
50  
51  
52  
53  
54  
55  
56  
57  
58  
59  
60



171x97mm (96 x 96 DPI)

1  
2  
3  
4  
5  
6  
7  
8  
9  
10  
11  
12  
13  
14  
15  
16  
17  
18  
19  
20  
21  
22  
23  
24  
25  
26  
27  
28  
29  
30  
31  
32  
33  
34  
35  
36  
37  
38  
39  
40  
41  
42  
43  
44  
45  
46  
47  
48  
49  
50  
51  
52  
53  
54  
55  
56  
57  
58  
59  
60



325x316mm (38 x 38 DPI)
